# Supplementary material for: Ornaments Reveal Resistance of North European Cultures to the Spread of Farming
Source: PubMed Central journal article supplement (PMC4390204; doi:10.1371/journal.pone.0121166), 2015-04-08
Supplement: pone.0121166.s002.pdf [file pone.0121166.s002.pdf]

# Ornaments reveal resistance of North European cultures to the spread of farming

Solange Rigaud, Francesco d'Errico, Marian Vanhaeren

## SUPPORTING INFORMATION (SI)

|                                                                                                                                                                                                       |    |
|-------------------------------------------------------------------------------------------------------------------------------------------------------------------------------------------------------|----|
| SUPPORTING TEXTS.....                                                                                                                                                                                 | 2  |
| TEXT A: Archaeological cultures plotted in figures 1 and 2.....                                                                                                                                       | 2  |
| TEXT B: Bead typology used to create the binary data cultural matrix.....                                                                                                                             | 4  |
| SUPPORTING FIGURES .....                                                                                                                                                                              | 5  |
| Fig. A. Examples of the shells species used as beads and recorded in the database .....                                                                                                               | 5  |
| Fig. B. Examples of vertebrae teeth used as beads and recorded in the database.....                                                                                                                   | 6  |
| Fig. C. Classification of beads, pendants, platelets and bracelets. Some bead types were redrawn from [34,35,38,39]. .....                                                                            | 7  |
| SUPPORTING TABLES .....                                                                                                                                                                               | 8  |
| Table A. SIMPER analysis identifying bead-types most responsible for cultural differences between Mesolithic and Early Neolithic archaeological datasets. Overall average dissimilarity : 91,11 ..... | 8  |
| Table B. List of the shell taxa used as beads and recorded in the database .....                                                                                                                      | 12 |
| Table C. List of the vertebrate bones and teeth recorded in the database (I: incisor, C: canine, M: molar, indet: indeterminate) .....                                                                | 13 |
| Table D. List of the mineral raw materials recorded in the database .....                                                                                                                             | 14 |
| Table E. List of the bead-types recorded in the database.....                                                                                                                                         | 14 |
| Table F. List of the bead-types present in each of the archaeological cultures .....                                                                                                                  | 18 |
| SUPPORTING DATASET.....                                                                                                                                                                               | 19 |
| DATASET S1 (Separate Excel sheet). Database of the Mesolithic and Early Neolithic European sites used in the analysis. ....                                                                           | 19 |
| REFERENCES FOR SUPPORTING INFORMATION.....                                                                                                                                                            | 19 |

## SUPPORTING TEXTS

### TEXT A: Archaeological cultures plotted in figures 1 and 2

- 1: Rubané Final du Bassin Parisien, Early Neolithic, Paris Basin, 5000-4800 cal BC[1].
- 2: Villeneuve Saint-Germain, Early Neolithic, Paris Basin, Brittany and Belgium, 4950–4650 cal BC[2].
- 3: Middle Linearbandkeramik, Early Neolithic, Central Europe, circa 5200 cal BC[3].
- 4: Late Linearbandkeramik, Early Neolithic, Central Europe, circa 5100 cal BC[3].
- 5: Rubané Récent du Bassin Parisien, Early Neolithic, Paris basin, 5100-4900 cal BC[4].
- 6: Hinkelstein, Early Neolithic, Middle Rhine valley, 5500-500 cal BC[5].
- 7: Linearbandkeramik sites from central Europe that were directly or indirectly attributed to the Early Neolithic with no further precision in the literature, 5500-5000 cal BC.
- 8: Early Linearbandkeramik, Early Neolithic, Central Europe, 5600-5450 cal BC[3].
- 9: Final Linearbandkeramik, Early Neolithic, Central Europe, circa 5000 cal BC[3].
- 10: Early Neolithic archaeological sites located in Crete and Greece, 6800-6600 cal BC[6].
- 11: Impressa, Early Neolithic, Adriatic coast, Italy and East of the lower Rhone valley, 5700-5600 cal BC[7].
- 12: Cardial, Early Neolithic, Western Mediterranean, 5600-4800 cal BC[8].
- 13: Epicardial, Early Neolithic, Western Mediterranean from Western Alps and Lower Rhône valley to Andalusia, 5400-4500 cal BC[7].
- 14: Starcevo, Early Neolithic, Danubian plain, Morava valley, Serbia and northwest Bulgaria, 6300-5500 cal BC [9].
- 15: Late Mesolithic sites from Lower Danube Valley, 7500-6400 cal BC[10,11].
- 16: Obanian, Late Mesolithic and Early Neolithic shell middens from Western Scotland, 7500–3900 cal BC[12].
- 17: Early and Middle Mesolithic, Southwest Europe, 8500- 7000 cal BC[13].
- 18: Beuronian, Mesolithic, Germany, 8500-6500 cal BC[14].
- 19: Asturian, Late Mesolithic shell middens from North Iberia Atlantic coast, 8100-5500 cal BC[15].
- 20: Early Mesolithic from Britain, 8600-7800 cal BC[16].
- 21: Early Mesolithic from the Lower Danube Valley, 8400-7500 cal BC[10,11].
- 22: Mesolítico Geométrico, Late Mesolithic from the Iberian Peninsula, 7000-5200 cal BC[17,18].
- 23: Mesolítico muescas y denticulados, Early Mesolithic from the Iberian Peninsula, 8200-6400 cal BC[19].
- 24: Mesolítico Macrolítico, Early Mesolithic from the Iberian Peninsula, 9800-7400 cal BC[20].
- 25: Cocina, Late Mesolithic from the Iberian Peninsula, 6500-5500 cal BC[17].
- 26: Late Mesolithic layers from Franchti Cave (Greece), 7050-6300 cal BC[21].

- 27:** Early Mesolithic from Franchti cave (Greece), 8750-8200 cal BC[21].
- 28:** Personal ornaments from the Middle Mesolithic site of la Chaussée-Tirancourt (France) dated circa to 7600 cal BC[22].
- 29:** Castelnovian, Late Mesolithic, Southwest Europe, 6500-5000 cal BC[23].
- 30:** Teviecian, North Atlantic coast Late Mesolithic culture, Brittany, 5700-5000 cal BC[24].
- 31:** Early Neolithic from the Baltic region, including archaeological layers from sites located in Scandinavia and Eastern coastal Baltic areas (Lithuania, Latvia, Estonia, North of Poland). Archaeological layers are directly or indirectly attributed to the Early Neolithic with no further precision in the literature (5500-4200 cal BC).
- 32:** Burials from Zvejnieki cemetery (Latvia) where both Mesolithic and Early Neolithic features are identified[25].
- 33:** Early Mesolithic archaeological layers from sites located in Scandinavia and Eastern coastal Baltic areas (Lithuania, Latvia, Estonia, North of Poland). Archaeological layers are directly or indirectly attributed to the Early Mesolithic with no further precision (9500-6500 cal BC).
- 34:** Narva culture, Early Neolithic, North East Poland, Lithuania, Latvia, Estonia and western Russia, 5500-4200 cal BC[26].
- 35:** Middle Mesolithic archaeological layers from sites located in Scandinavia and Eastern coastal Baltic areas (Lithuania, Latvia, Estonia, North of Poland). Archaeological layers are directly or indirectly attributed to the Middle Mesolithic with no further precision (5500-5200 cal BC).
- 36:** Early Ertebølle, beginning of the Late Mesolithic, Southern Scandinavia and Northern Germany, 5400-4800 cal BC[27,28].
- 37:** Late Kongemosian, final Middle Mesolithic, South Scandinavia and Denmark, 5700-5200 cal BC[27].
- 38:** Kongemosian, Middle Mesolithic, South Scandinavia and Denmark, 6500-5400 cal BC[27,28].
- 39:** Ertebølle, Late Mesolithic, Southern Scandinavia and Northern Germany, 5400-3800 cal BC[27].
- 40:** Mid-Ertebølle, Late Mesolithic, Southern Scandinavia and Northern Germany, 4800-4300 cal BC[27].
- 41:** Funnel Beaker culture, Early Neolithic, North of Central Europe and Southern Scandinavia, 4200-2800 cal BC[29].
- 42:** Janislawice, Late Mesolithic, Poland and Lithuania, 6400-5500 cal BC[30].
- 43:** Komornica, Early Mesolithic, Northeast Poland, 8500-7000 cal BC[31].
- 44:** Early Neolithic archaeological layers from Karelia and Volga, 6500 -5400 cal BC[32].
- 45:** Kunda, Mesolithic, Northeast Poland, Lithuania, Latvia, Estonia and western Russia, 8500-5500 cal BC[26].

**46:** Late Mesolithic from archaeological layers of sites located in Scandinavia and Eastern coastal Baltic areas (Lithuania, Latvia, Estonia, North of Poland). Archaeological layers are directly or indirectly attributed to the Late Mesolithic with no further precision (5500-4200).

**47:** Maglemosian, Early Mesolithic, South Scandinavia and Denmark, 9600-6500 cal BC[33].

**48:** Mesolithic from Karelia and Volga, 9500-6500 cal BC[32].

## **TEXT B: Bead typology used to create the binary data cultural matrix**

We have simplified and homogenized bead typologies previously published [34–42] in order to create mutually exclusive bead-types.

Bead-types included in the database are characterized by their shape, raw material and system of suspension. Unshaped objects include small size Bivalvias, gastropods, scaphopods, mammal's teeth and short bones simply perforated, grooved or incised for suspension. Distinction is made between beads, pendants, platelets and bracelets.

Beads are made of 78 species of modern marine and 26 fossil shells, 9 freshwater shells, 2 terrestrial snails (Table S1, Fig. S1), the teeth or bones from 25 different species of vertebrates (Table S2, Fig. S2), amber, and 13 different types of mineral resources (Table S3), including 8 petrographic sub-types.

Shaped bead-types with common, or very similar, characteristics in terms of shape, section and profile were grouped into eleven major classes: discoid, oval, square, rectangular, trapezoidal and triangular beads, beads drop-shaped with a distal enlargement, round beads, bi-conical beads, tubular beads with circular section and linear profile, tubular beads with circular section and curved profile (Fig. S3; 1-11).

Pendants and platelets are described according to their width, elongation and number of perforations. Four types of pendants: arciform, straight, triangular and trapezoidal (Fig. S3; 12-20) and two categories of platelets (Fig. S3; 18-20): round to oval and square to rectangular, were considered.

Bracelets were ordered into four distinct types defined according to their section: oval (Fig. S3; 21-23), triangular (Fig. S3; 26-28), flat rectangular (Fig. S3; 29) and grooved ellipsoidal (Fig. S3; 24, 25).

Ear Studs, and antler and bone rings are additional bead types included in the database.

## SUPPORTING FIGURES

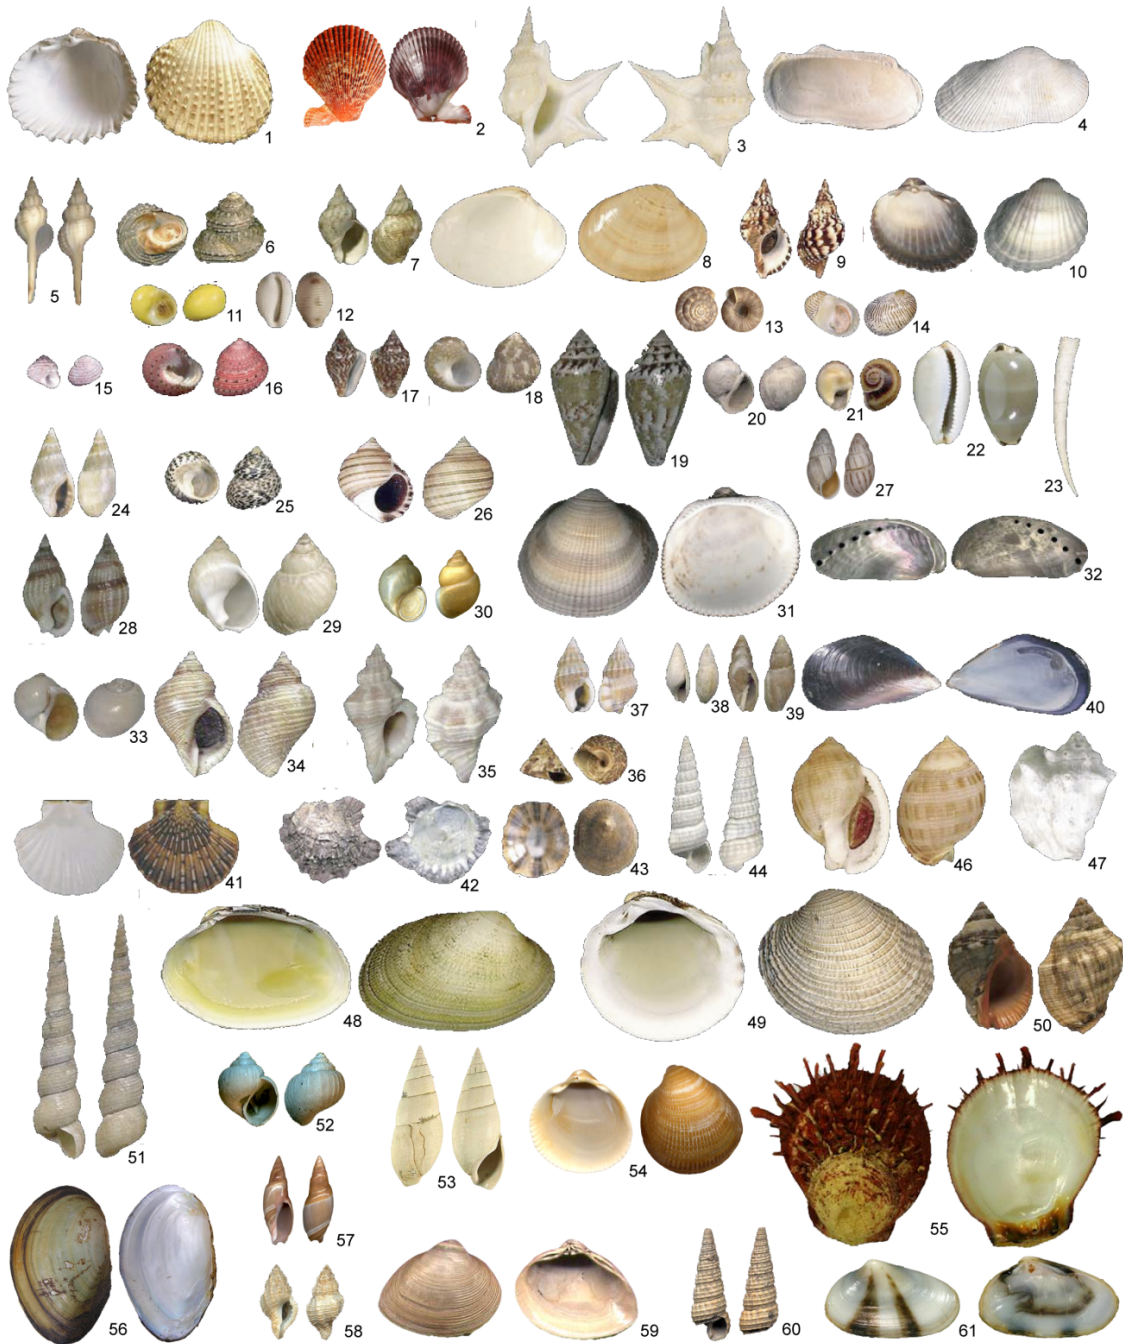

- 1) *Acanthocardia* sp., 2) *Chlamys varia*, 3) *Aporrhais pespelecani*, 4) *Arca noae*, 5) *Fusus* sp., 6) *Architectonica* sp., 7) *Buccinum* sp., 8) *Callista chione*, 9) *Charonia lampas*, 10) *Cerastoderma edule*, 11) *Littorina obtusata*, 12) *Trivia monacha*, 13) *Discus rotundatus*, 14) *Theodoxus* sp., 15) *Homalopoma sanguineum*, 16) *Clanculus* sp., 17) *Columbella rustica*, 18) *Gibbula* sp., 19) *Conus* sp., 20) *Crommium* sp., 21) *Cyclope neritea*, 22) *Luria lurida*, 23) *Antalis* sp., 24) *Nassarius comiculum*, 25) *Osilinus* sp., 26) *Littorina littorea*, 27) *Zebrina detrita*, 28) *Nassarius reticulatus*, 29) *Nassarius mutabilis*, 30) *Bythinia tentaculata*, 31) *Glycymeris* sp., 32) *Haliotis* sp., 33) *Natica* sp., 34) *Nucella lapillus*, 35) *Ocenebra* sp., 36) *Trochus* sp., 37) *Nassarius incrassatus*, 38) *Melanopsis* sp., 39) *Mitra* sp., 40) *Mytilus* sp., 41) *Pecten* sp., 42) *Ostrea* sp., 43) *Patella* sp., 44) *Potamides* sp., 46) *Phalium saburon*, 47) *Strombus* sp., 48) *Tapes* sp., 49) *Venus* sp., 50) *Stramonita haemastoma*, 51) *Turitella* sp., 52) *Ampullina* sp., 53) *Bayania* sp., 54) *Laevicardium* sp., 55) *Spondylus gaederopus*, 56) *Unio* sp., 57) *Amalda* sp., 58) *Trophon* sp., 59) *Corbicula* sp., 60) *Tympanotonos* sp., 61) *Donax* sp.

**Fig. A. Examples of the shells species used as beads and recorded in the database**

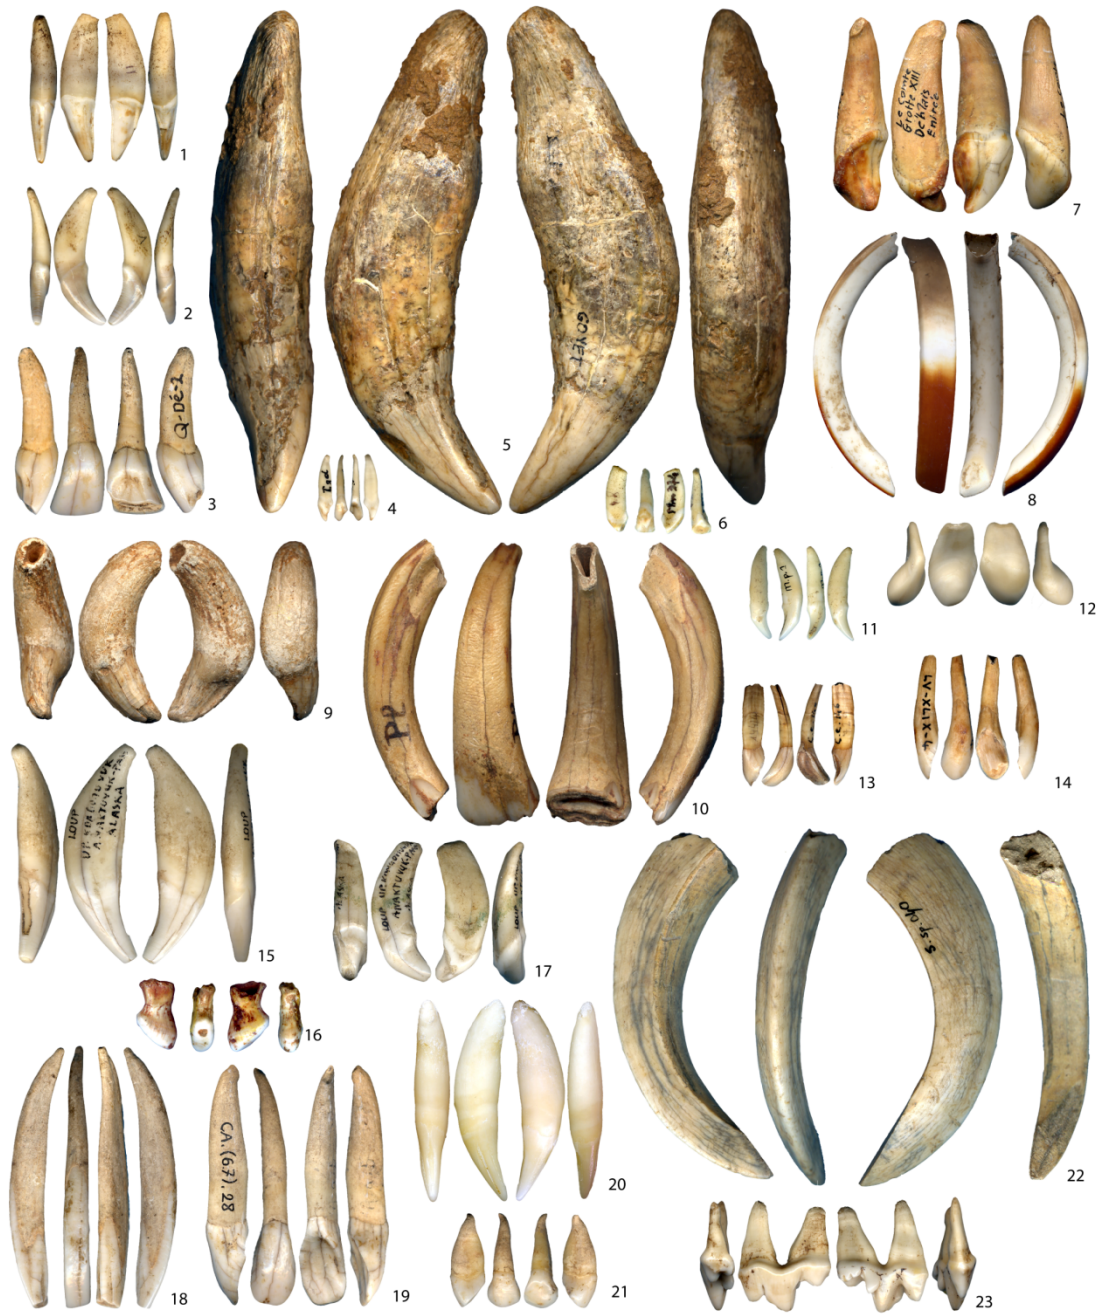

1) Badger canine, 2) Fox canine, 3) Bovidae incisor, 4) Fox incisor, 5) Bear canine, 6) Badger incisor, 7) Bear incisor, 8) Beaver incisor, 9) Horse canine, 10) Horse incisor, 11) Polecate canine, 12) Red deer canine, 13) Red deer incisor, 14) Ibex incisor, 15) Canidae canine, 16) Rutilus sp. pharyngeal tooth, 17) Canidae incisor, 18) Wild boar incisor, 19) Elk incisor, 20) Lynx canine, 21) Human incisor, 22) Wild boar canine, 23) Canidae molar.

**Fig. B. Examples of vertebrae teeth used as beads and recorded in the database**

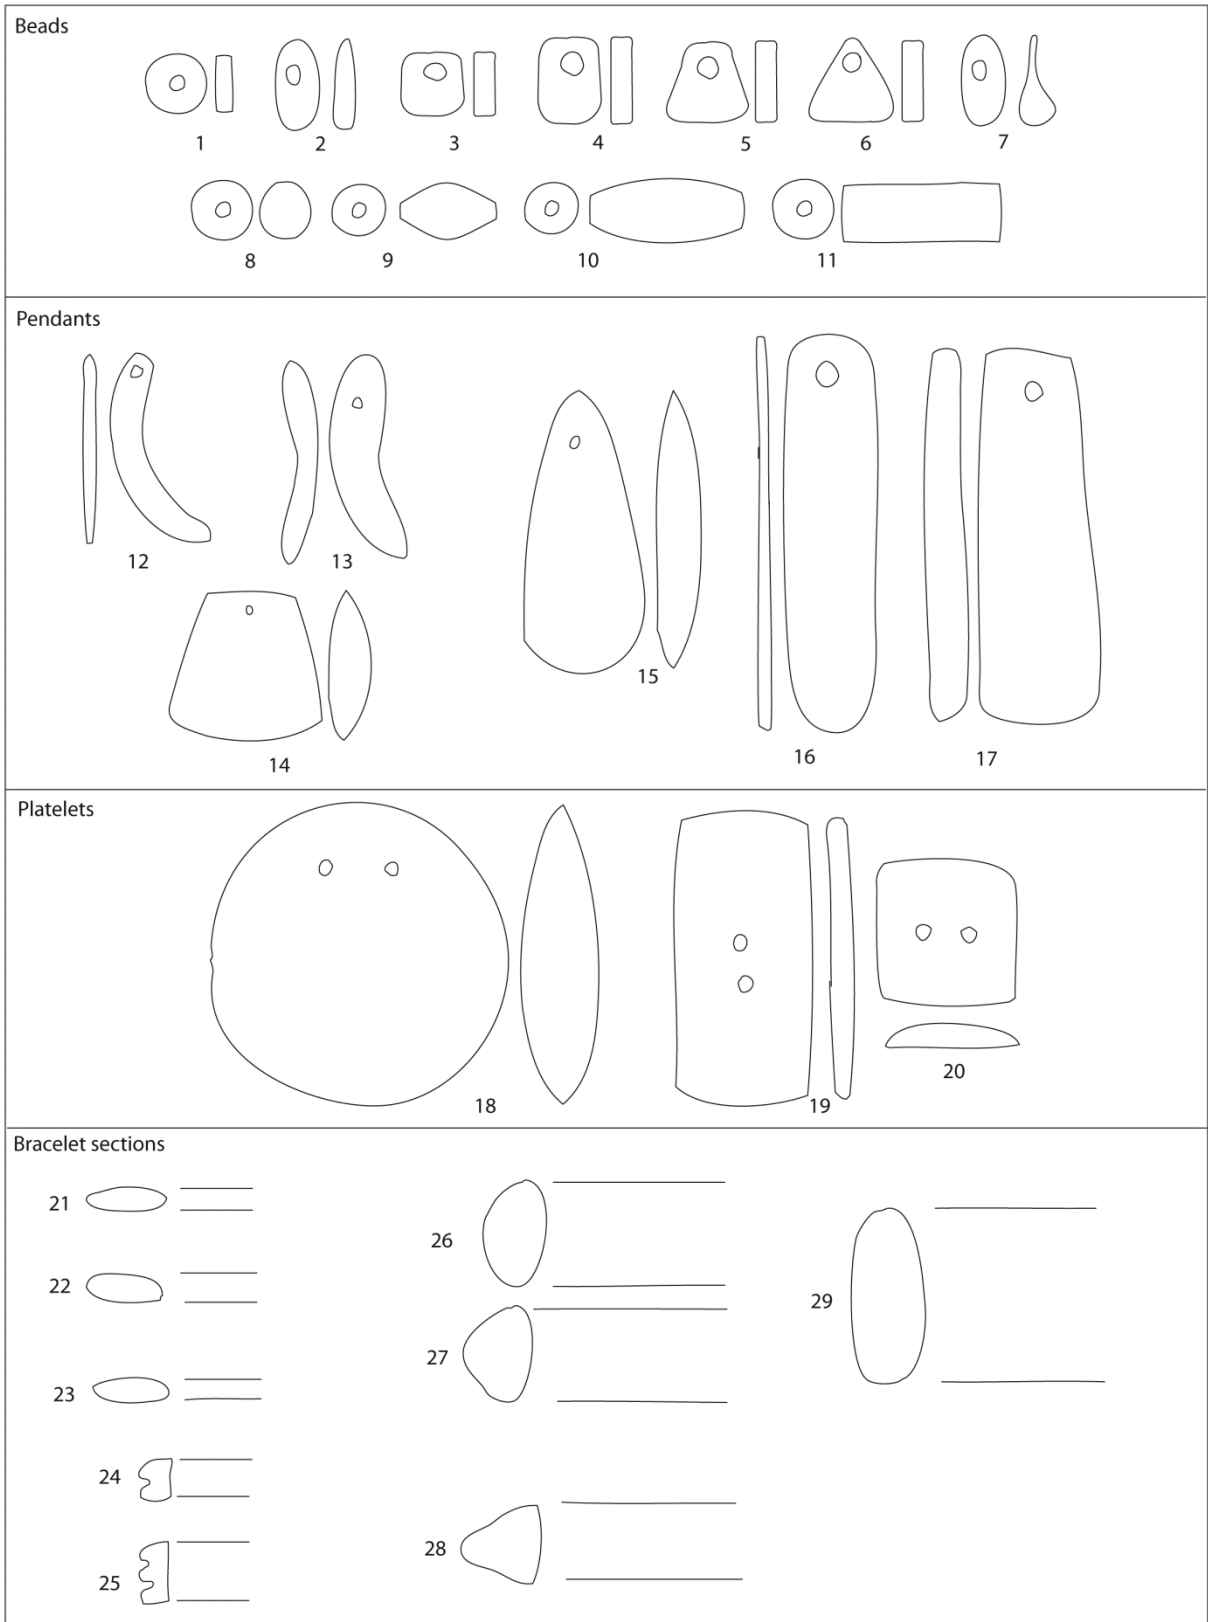

**Fig. C. Classification of beads, pendants, platelets and bracelets. Some bead types were redrawn from [34,35,38,39].**

## SUPPORTING TABLES

**Table A. SIMPER analysis identifying bead-types most responsible for cultural differences between Mesolithic and Early Neolithic archaeological datasets. Overall average dissimilarity : 91,11**

| Taxon    | Av. dissim | Contrib. % | Cumulative % | WEM    | BM     | BEN | DEN   | MEN  |
|----------|------------|------------|--------------|--------|--------|-----|-------|------|
| Antalis  | 2.432      | 2.67       | 2.67         | 0.625  | 0      | 0   | 1     | 1    |
| ICelP    | 2.191      | 2.405      | 5.074        | 0.125  | 0.692  | 0.8 | 0     | 0.25 |
| IAlcP    | 2.177      | 2.39       | 7.464        | 0      | 0.769  | 0.6 | 0     | 0    |
| CCelP    | 2.104      | 2.31       | 9.773        | 0.563  | 0.538  | 0.2 | 0.444 | 0.75 |
| Columbel | 2.012      | 2.208      | 11.98        | 0.625  | 0      | 0   | 0.222 | 0.75 |
| ISusP    | 1.869      | 2.051      | 14.03        | 0      | 0.615  | 0.6 | 0     | 0.25 |
| Gly      | 1.63       | 1.789      | 15.82        | 0.438  | 0      | 0   | 0.333 | 0.75 |
| nassariu | 1.611      | 1.768      | 17.59        | 0.625  | 0      | 0   | 0     | 0.5  |
| CSusP    | 1.513      | 1.661      | 19.25        | 0.0625 | 0.308  | 0.4 | 0.556 | 0.75 |
| PSheDsc  | 1.445      | 1.586      | 20.84        | 0      | 0      | 0   | 0.889 | 1    |
| PtOs     | 1.418      | 1.557      | 22.39        | 0.25   | 0.308  | 0.2 | 0.111 | 0.75 |
| Cyclope  | 1.404      | 1.541      | 23.93        | 0.438  | 0      | 0   | 0.111 | 0.5  |
| IBosP    | 1.385      | 1.52       | 25.45        | 0      | 0.462  | 0.6 | 0     | 0.25 |
| Trivia   | 1.352      | 1.484      | 26.94        | 0.438  | 0      | 0   | 0.222 | 0.75 |
| Pecten   | 1.35       | 1.482      | 28.42        | 0.438  | 0      | 0   | 0.111 | 0.75 |
| Spond    | 1.279      | 1.404      | 29.82        | 0.0625 | 0      | 0   | 0.778 | 0.5  |
| PSheOv   | 1.252      | 1.374      | 31.2         | 0      | 0      | 0   | 0.778 | 0.75 |
| Theodoxu | 1.244      | 1.366      | 32.56        | 0.313  | 0.154  | 0   | 0.333 | 0.5  |
| PCalDsc  | 1.233      | 1.354      | 33.92        | 0.0625 | 0      | 0   | 0.667 | 0.75 |
| PtAmb    | 1.215      | 1.333      | 35.25        | 0.0625 | 0.0769 | 0.6 | 0     | 0    |
| POsTub   | 1.202      | 1.319      | 36.57        | 0.125  | 0.154  | 0.2 | 0.222 | 1    |
| CCanP    | 1.161      | 1.274      | 37.84        | 0.0625 | 0.308  | 0.6 | 0.222 | 0.5  |
| BrcSchi  | 1.147      | 1.259      | 39.1         | 0      | 0      | 0.2 | 0.556 | 0.5  |
| Littor   | 1.121      | 1.23       | 40.33        | 0.438  | 0      | 0   | 0.111 | 0    |
| Cerith   | 1.101      | 1.209      | 41.54        | 0.375  | 0      | 0   | 0.111 | 0.75 |
| PAmb     | 1.079      | 1.184      | 42.73        | 0      | 0.308  | 0.4 | 0     | 0    |
| PSpoTub  | 1.061      | 1.165      | 43.89        | 0      | 0      | 0   | 0.778 | 0    |
| CVulP    | 1.049      | 1.151      | 45.04        | 0.188  | 0.0769 | 0.6 | 0.111 | 0.75 |
| AnOs     | 1.043      | 1.145      | 46.19        | 0      | 0      | 0   | 0.667 | 0.5  |
| Natica   | 1.011      | 1.109      | 47.3         | 0.25   | 0      | 0   | 0.333 | 0    |
| Spolnc   | 0.9627     | 1.057      | 48.35        | 0      | 0      | 0   | 0.667 | 0.25 |
| Cerast   | 0.9612     | 1.055      | 49.41        | 0.375  | 0      | 0   | 0.111 | 0.75 |
| ICastP   | 0.9471     | 1.039      | 50.45        | 0      | 0.308  | 0.4 | 0     | 0    |
| Nucella  | 0.9389     | 1.031      | 51.48        | 0.188  | 0      | 0   | 0.444 | 0    |
| PtGal    | 0.9162     | 1.006      | 52.48        | 0.25   | 0.0769 | 0   | 0.222 | 0.25 |
| CUrsP    | 0.8286     | 0.9094     | 53.39        | 0      | 0.308  | 0.4 | 0     | 0.25 |
| ICanP    | 0.8206     | 0.9007     | 54.29        | 0      | 0.308  | 0.4 | 0     | 0    |
| Lithogly | 0.7581     | 0.8321     | 55.13        | 0.25   | 0      | 0   | 0.111 | 0    |
| BrcSpond | 0.7575     | 0.8314     | 55.96        | 0      | 0      | 0   | 0.444 | 0.5  |
| Unio     | 0.7493     | 0.8224     | 56.78        | 0.0625 | 0      | 0   | 0.556 | 0    |
| CMartP   | 0.7008     | 0.7692     | 57.55        | 0      | 0.154  | 0.6 | 0     | 0    |
| PCalTub  | 0.6862     | 0.7531     | 58.3         | 0      | 0      | 0   | 0.444 | 0.25 |
| CMelesP  | 0.6816     | 0.7481     | 59.05        | 0.0625 | 0.0769 | 0.6 | 0     | 0.25 |
| Potamide | 0.6456     | 0.7085     | 59.76        | 0.188  | 0      | 0   | 0.222 | 0    |
| PSheTrg  | 0.6452     | 0.7081     | 60.47        | 0.0625 | 0      | 0   | 0.444 | 0    |
| BrcCalc  | 0.6392     | 0.7015     | 61.17        | 0      | 0      | 0   | 0.444 | 0.5  |
| BrcRv    | 0.6322     | 0.6939     | 61.86        | 0      | 0      | 0   | 0.444 | 0.25 |
| PStoDsc  | 0.5737     | 0.6296     | 62.49        | 0.125  | 0      | 0   | 0     | 0.75 |
| Patella  | 0.5723     | 0.6282     | 63.12        | 0.25   | 0      | 0   | 0     | 0.5  |
| CLutP    | 0.5666     | 0.6218     | 63.74        | 0      | 0.154  | 0.4 | 0     | 0    |
| CAIcP    | 0.5417     | 0.5945     | 64.34        | 0      | 0.231  | 0.2 | 0     | 0    |
| PtSpo    | 0.5337     | 0.5857     | 64.92        | 0      | 0      | 0   | 0.222 | 0.5  |
| PtSchi   | 0.5175     | 0.568      | 65.49        | 0.0625 | 0      | 0.2 | 0     | 0.25 |



Table S1. cont.

| Taxon      | Av. dissim | Contrib. % | Cumulative % | WEM    | BM     | BEN | DEN   | MEN  |
|------------|------------|------------|--------------|--------|--------|-----|-------|------|
| BrcGly     | 0.493      | 0.5411     | 66.03        | 0      | 0      | 0   | 0.222 | 0.75 |
| Acantho    | 0.4865     | 0.5339     | 66.57        | 0.125  | 0      | 0   | 0     | 0.75 |
| IEquP      | 0.4808     | 0.5277     | 67.09        | 0      | 0.154  | 0.4 | 0     | 0    |
| TGardon    | 0.4572     | 0.5018     | 67.6         | 0.188  | 0      | 0   | 0     | 0    |
| CPhoP      | 0.4385     | 0.4813     | 68.08        | 0      | 0.0769 | 0.4 | 0     | 0    |
| PSheRd     | 0.405      | 0.4445     | 68.52        | 0.0625 | 0      | 0   | 0.111 | 0    |
| PSheGtt    | 0.3969     | 0.4357     | 68.96        | 0      | 0      | 0   | 0.222 | 0.5  |
| BrcArg     | 0.3908     | 0.429      | 69.39        | 0      | 0      | 0   | 0.333 | 0    |
| PSheTrz    | 0.3908     | 0.429      | 69.81        | 0      | 0      | 0   | 0.333 | 0    |
| BrcOs      | 0.3889     | 0.4268     | 70.24        | 0      | 0.0769 | 0   | 0.111 | 0    |
| Veneri     | 0.3805     | 0.4177     | 70.66        | 0      | 0      | 0   | 0.333 | 0    |
| PSchiDsc   | 0.3697     | 0.4058     | 71.06        | 0.0625 | 0      | 0   | 0     | 0.5  |
| ICaprP     | 0.3674     | 0.4032     | 71.47        | 0      | 0.154  | 0   | 0     | 0.25 |
| AnShell    | 0.3652     | 0.4009     | 71.87        | 0      | 0      | 0   | 0     | 1    |
| Ostrea     | 0.3599     | 0.395      | 72.26        | 0.188  | 0      | 0   | 0     | 0    |
| Conus      | 0.3566     | 0.3914     | 72.66        | 0.125  | 0      | 0   | 0     | 0.75 |
| EnaDetrita | 0.3475     | 0.3814     | 73.04        | 0      | 0      | 0   | 0.222 | 0    |
| BrcMbr     | 0.3353     | 0.368      | 73.4         | 0      | 0      | 0   | 0.111 | 0.5  |
| Luria      | 0.3312     | 0.3635     | 73.77        | 0.0625 | 0      | 0   | 0     | 0.5  |
| MCanP      | 0.3242     | 0.3558     | 74.12        | 0      | 0.0769 | 0.2 | 0     | 0.25 |
| PIOs       | 0.3232     | 0.3548     | 74.48        | 0      | 0.0769 | 0   | 0     | 0.75 |
| IUrSP      | 0.3083     | 0.3384     | 74.82        | 0      | 0.0769 | 0.2 | 0     | 0    |
| MCastP     | 0.2996     | 0.3289     | 75.15        | 0      | 0.0769 | 0.2 | 0     | 0    |
| BrcGres    | 0.2939     | 0.3226     | 75.47        | 0      | 0      | 0   | 0.222 | 0    |
| Ampulli    | 0.2936     | 0.3223     | 75.79        | 0.188  | 0      | 0   | 0     | 0    |
| PRVOv      | 0.2935     | 0.3221     | 76.11        | 0      | 0      | 0   | 0     | 0.75 |
| BrcVC      | 0.2926     | 0.3211     | 76.43        | 0      | 0      | 0   | 0.222 | 0    |
| CEqP       | 0.291      | 0.3194     | 76.75        | 0      | 0      | 0.4 | 0     | 0    |
| PMSusP     | 0.291      | 0.3194     | 77.07        | 0      | 0      | 0.4 | 0     | 0    |
| PMAIcP     | 0.291      | 0.3194     | 77.39        | 0      | 0      | 0.4 | 0     | 0    |
| PtGly      | 0.2858     | 0.3136     | 77.71        | 0.0625 | 0      | 0   | 0     | 0.5  |
| MHumP      | 0.284      | 0.3117     | 78.02        | 0.0625 | 0.154  | 0   | 0     | 0    |
| PCalGtt    | 0.2822     | 0.3097     | 78.33        | 0      | 0      | 0   | 0.111 | 0.5  |
| Melanopsis | 0.2818     | 0.3092     | 78.64        | 0.0625 | 0      | 0   | 0     | 0.25 |
| PArgTub    | 0.2817     | 0.3092     | 78.95        | 0      | 0      | 0   | 0     | 0.75 |
| PSttDsc    | 0.2817     | 0.3092     | 79.26        | 0      | 0      | 0   | 0     | 0.75 |
| PStoTub    | 0.2808     | 0.3082     | 79.56        | 0.0625 | 0      | 0   | 0.111 | 0.25 |
| Turritel   | 0.2746     | 0.3014     | 79.86        | 0.0625 | 0      | 0   | 0.111 | 0    |
| Mytilus    | 0.2676     | 0.2937     | 80.16        | 0.0625 | 0      | 0   | 0.111 | 0.25 |
| MPhoP      | 0.2624     | 0.288      | 80.45        | 0      | 0.154  | 0   | 0     | 0    |
| IHumP      | 0.2624     | 0.288      | 80.73        | 0      | 0.154  | 0   | 0     | 0    |
| IMelP      | 0.2624     | 0.288      | 81.02        | 0      | 0.154  | 0   | 0     | 0    |
| Ocenebra   | 0.2616     | 0.2872     | 81.31        | 0.188  | 0      | 0   | 0     | 0    |
| Laevicar   | 0.2616     | 0.2872     | 81.6         | 0.188  | 0      | 0   | 0     | 0    |
| PendCastP  | 0.2584     | 0.2836     | 81.88        | 0      | 0.0769 | 0.2 | 0     | 0    |
| PtQrtz     | 0.2576     | 0.2827     | 82.16        | 0.0625 | 0.0769 | 0   | 0     | 0.25 |
| MAIcP      | 0.2496     | 0.274      | 82.44        | 0      | 0.0769 | 0.2 | 0     | 0    |
| PCalCar    | 0.2387     | 0.262      | 82.7         | 0      | 0      | 0   | 0.222 | 0    |
| Cypraea    | 0.2367     | 0.2598     | 82.96        | 0.0625 | 0      | 0   | 0     | 0.5  |
| Gyraulus   | 0.2352     | 0.2581     | 83.22        | 0.125  | 0      | 0   | 0     | 0    |
| IRoeDeerP  | 0.2282     | 0.2505     | 83.47        | 0      | 0.154  | 0   | 0     | 0    |
| Pirenella  | 0.2251     | 0.2471     | 83.71        | 0.125  | 0      | 0   | 0     | 0    |
| PLignDsc   | 0.222      | 0.2436     | 83.96        | 0      | 0      | 0   | 0.222 | 0    |
| Aporrhai   | 0.2211     | 0.2426     | 84.2         | 0.0625 | 0      | 0   | 0     | 0.25 |
| PSerpDsc   | 0.2188     | 0.2402     | 84.44        | 0      | 0      | 0   | 0     | 0.5  |
| Charo      | 0.2181     | 0.2394     | 84.68        | 0      | 0      | 0   | 0     | 0.75 |
| Osilinus   | 0.2145     | 0.2354     | 84.92        | 0.0625 | 0      | 0   | 0     | 0.25 |
| BrcRn      | 0.2123     | 0.233      | 85.15        | 0      | 0      | 0   | 0.111 | 0.25 |
| Bayania    | 0.2116     | 0.2323     | 85.38        | 0.125  | 0      | 0   | 0     | 0    |
| IVulpP     | 0.2108     | 0.2313     | 85.61        | 0      | 0.154  | 0   | 0     | 0    |

Table S1. cont.

| Taxon       | Av. dissim | Contrib. % | Cumulative % | WEM    | BM     | BEN | DEN   | MEN  |
|-------------|------------|------------|--------------|--------|--------|-----|-------|------|
| BrcOsili    | 0.21       | 0.2305     | 85.84        | 0      | 0      | 0   | 0     | 0.5  |
| spisula     | 0.2096     | 0.23       | 86.07        | 0.0625 | 0      | 0   | 0.111 | 0    |
| Phalium     | 0.2018     | 0.2215     | 86.29        | 0.0625 | 0      | 0   | 0     | 0.5  |
| PIspoAt     | 0.1956     | 0.2147     | 86.51        | 0      | 0      | 0   | 0.111 | 0    |
| McelP       | 0.1819     | 0.1996     | 86.71        | 0.0625 | 0.0769 | 0   | 0     | 0    |
| Euspira     | 0.1796     | 0.1972     | 86.91        | 0.125  | 0      | 0   | 0     | 0    |
| Chlamys     | 0.1765     | 0.1937     | 87.1         | 0.0625 | 0      | 0   | 0     | 0.25 |
| Trophon     | 0.168      | 0.1844     | 87.28        | 0.0625 | 0      | 0   | 0     | 0.25 |
| Haliotis    | 0.168      | 0.1844     | 87.47        | 0.0625 | 0      | 0   | 0     | 0.25 |
| MLutrGr     | 0.1657     | 0.1819     | 87.65        | 0      | 0.0769 | 0   | 0     | 0    |
| POsD        | 0.1657     | 0.1819     | 87.83        | 0      | 0.0769 | 0   | 0     | 0    |
| PMUrsGr     | 0.1657     | 0.1819     | 88.01        | 0      | 0.0769 | 0   | 0     | 0    |
| PtAnt       | 0.1649     | 0.1809     | 88.2         | 0.0625 | 0.0769 | 0   | 0     | 0    |
| PMudDsc     | 0.1611     | 0.1768     | 88.37        | 0.0625 | 0      | 0   | 0     | 0    |
| AnSchi      | 0.1575     | 0.1729     | 88.54        | 0      | 0      | 0   | 0.111 | 0.25 |
| CFelP       | 0.1571     | 0.1724     | 88.72        | 0      | 0.0769 | 0   | 0     | 0.25 |
| PtCal       | 0.1552     | 0.1704     | 88.89        | 0      | 0      | 0   | 0     | 0.5  |
| PhalCelP    | 0.1539     | 0.169      | 89.06        | 0.125  | 0      | 0   | 0     | 0    |
| Macoma      | 0.1532     | 0.1681     | 89.22        | 0.0625 | 0      | 0   | 0     | 0    |
| IPhoP       | 0.1501     | 0.1647     | 89.39        | 0      | 0      | 0.2 | 0     | 0    |
| PArgRd      | 0.1471     | 0.1614     | 89.55        | 0      | 0      | 0   | 0     | 0.25 |
| Stud        | 0.1471     | 0.1614     | 89.71        | 0      | 0      | 0   | 0     | 0.25 |
| PtStt       | 0.1471     | 0.1614     | 89.87        | 0      | 0      | 0   | 0     | 0.25 |
| PtSto       | 0.1471     | 0.1614     | 90.04        | 0      | 0      | 0   | 0     | 0.25 |
| PtMbr       | 0.1471     | 0.1614     | 90.2         | 0      | 0      | 0   | 0     | 0.25 |
| PRVTub      | 0.1471     | 0.1614     | 90.36        | 0      | 0      | 0   | 0     | 0.25 |
| PRVBout     | 0.1471     | 0.1614     | 90.52        | 0      | 0      | 0   | 0     | 0.25 |
| PMbrDsc     | 0.1471     | 0.1614     | 90.68        | 0      | 0      | 0   | 0     | 0.25 |
| PGalDsc     | 0.1471     | 0.1614     | 90.84        | 0      | 0      | 0   | 0     | 0.25 |
| PGalBic     | 0.1471     | 0.1614     | 91           | 0      | 0      | 0   | 0     | 0.25 |
| Psteatdsc   | 0.1464     | 0.1607     | 91.16        | 0      | 0      | 0   | 0     | 0.5  |
| AnCelAnt    | 0.1464     | 0.1607     | 91.33        | 0      | 0      | 0   | 0     | 0.5  |
| POsDsc      | 0.1464     | 0.1607     | 91.49        | 0      | 0      | 0   | 0     | 0.5  |
| DisStoP     | 0.1464     | 0.1607     | 91.65        | 0      | 0      | 0   | 0     | 0.5  |
| DisOsP      | 0.1464     | 0.1607     | 91.81        | 0      | 0      | 0   | 0     | 0.5  |
| Clancu      | 0.1461     | 0.1603     | 91.97        | 0.0625 | 0      | 0   | 0     | 0    |
| Callista    | 0.1461     | 0.1603     | 92.13        | 0.0625 | 0      | 0   | 0     | 0    |
| Tympano     | 0.1418     | 0.1556     | 92.28        | 0      | 0      | 0   | 0.111 | 0    |
| PSheOvBi    | 0.1418     | 0.1556     | 92.44        | 0      | 0      | 0   | 0.111 | 0    |
| Pisania     | 0.1412     | 0.155      | 92.59        | 0.0625 | 0      | 0   | 0     | 0.25 |
| AstrFelP    | 0.141      | 0.1547     | 92.75        | 0      | 0      | 0.2 | 0     | 0    |
| COttP       | 0.141      | 0.1547     | 92.9         | 0      | 0      | 0.2 | 0     | 0    |
| AstrCasP    | 0.141      | 0.1547     | 93.06        | 0      | 0      | 0.2 | 0     | 0    |
| EmOrbi      | 0.141      | 0.1547     | 93.21        | 0      | 0      | 0.2 | 0     | 0    |
| Conorbis    | 0.1397     | 0.1533     | 93.37        | 0.0625 | 0      | 0   | 0     | 0    |
| Keilosto    | 0.1397     | 0.1533     | 93.52        | 0.0625 | 0      | 0   | 0     | 0    |
| Amalda      | 0.1397     | 0.1533     | 93.67        | 0.0625 | 0      | 0   | 0     | 0    |
| PSheRectBip | 0.1372     | 0.1506     | 93.82        | 0      | 0      | 0   | 0.111 | 0    |
| Pnéphrite   | 0.1372     | 0.1506     | 93.97        | 0      | 0      | 0   | 0.111 | 0    |
| Pmbr        | 0.1372     | 0.1506     | 94.12        | 0      | 0      | 0   | 0.111 | 0    |
| Strombus    | 0.1346     | 0.1478     | 94.27        | 0      | 0      | 0   | 0     | 0.5  |
| PCalOv      | 0.1346     | 0.1478     | 94.42        | 0      | 0      | 0   | 0     | 0.5  |
| Stramoni    | 0.1346     | 0.1478     | 94.57        | 0      | 0      | 0   | 0     | 0.5  |
| Nerita      | 0.125      | 0.1372     | 94.71        | 0      | 0      | 0   | 0.111 | 0    |
| Corbicul    | 0.125      | 0.1372     | 94.84        | 0      | 0      | 0   | 0.111 | 0    |
| Stenomph    | 0.125      | 0.1372     | 94.98        | 0      | 0      | 0   | 0.111 | 0    |
| PtUnio      | 0.125      | 0.1372     | 95.12        | 0      | 0      | 0   | 0.111 | 0    |
| PSheCrrMI   | 0.125      | 0.1372     | 95.25        | 0      | 0      | 0   | 0.111 | 0    |
| PSheCrrBi   | 0.125      | 0.1372     | 95.39        | 0      | 0      | 0   | 0.111 | 0    |
| BrcAntl     | 0.125      | 0.1372     | 95.53        | 0      | 0      | 0   | 0.111 | 0    |

Table S1. cont.

| Taxon          | Av. dissim | Contrib. % | Cumulative % | WEM    | BM     | BEN | DEN   | MEN  |
|----------------|------------|------------|--------------|--------|--------|-----|-------|------|
| Granulo        | 0.125      | 0.1372     | 95.67        | 0      | 0      | 0   | 0.111 | 0    |
| MandiCastP     | 0.1141     | 0.1252     | 95.79        | 0      | 0.0769 | 0   | 0     | 0    |
| MandiAlcPerf   | 0.1141     | 0.1252     | 95.92        | 0      | 0.0769 | 0   | 0     | 0    |
| ILagomP        | 0.1141     | 0.1252     | 96.04        | 0      | 0.0769 | 0   | 0     | 0    |
| ICastPI        | 0.1141     | 0.1252     | 96.17        | 0      | 0.0769 | 0   | 0     | 0    |
| PhalOursgorge  | 0.1141     | 0.1252     | 96.29        | 0      | 0.0769 | 0   | 0     | 0    |
| PCastP         | 0.1141     | 0.1252     | 96.42        | 0      | 0.0769 | 0   | 0     | 0    |
| dentRequin     | 0.1141     | 0.1252     | 96.54        | 0      | 0.0769 | 0   | 0     | 0    |
| Buccinum       | 0.1077     | 0.1182     | 96.66        | 0.0625 | 0      | 0   | 0     | 0    |
| Nerinea        | 0.09693    | 0.1064     | 96.77        | 0      | 0      | 0   | 0.111 | 0    |
| POsTrz         | 0.09693    | 0.1064     | 96.87        | 0      | 0      | 0   | 0.111 | 0    |
| PosBic         | 0.09693    | 0.1064     | 96.98        | 0      | 0      | 0   | 0.111 | 0    |
| BrcVCTrP       | 0.09693    | 0.1064     | 97.09        | 0      | 0      | 0   | 0.111 | 0    |
| CPutP          | 0.09668    | 0.1061     | 97.19        | 0      | 0.0769 | 0   | 0     | 0    |
| Marginel       | 0.0835     | 0.09164    | 97.28        | 0      | 0      | 0   | 0     | 0.25 |
| PVascOv        | 0.0835     | 0.09164    | 97.38        | 0      | 0      | 0   | 0     | 0.25 |
| Gibberul       | 0.0835     | 0.09164    | 97.47        | 0      | 0      | 0   | 0     | 0.25 |
| DisNacrP       | 0.0835     | 0.09164    | 97.56        | 0      | 0      | 0   | 0     | 0.25 |
| AnCalc         | 0.0835     | 0.09164    | 97.65        | 0      | 0      | 0   | 0     | 0.25 |
| TmamSeaGr      | 0.082      | 0.09001    | 97.74        | 0.0625 | 0      | 0   | 0     | 0    |
| PICalcAt       | 0.082      | 0.09001    | 97.83        | 0.0625 | 0      | 0   | 0     | 0    |
| Bithynia       | 0.082      | 0.09001    | 97.92        | 0.0625 | 0      | 0   | 0     | 0    |
| Venus          | 0.07194    | 0.07895    | 98           | 0.0625 | 0      | 0   | 0     | 0    |
| Fagotia        | 0.07194    | 0.07895    | 98.08        | 0.0625 | 0      | 0   | 0     | 0    |
| Calliost       | 0.07194    | 0.07895    | 98.16        | 0.0625 | 0      | 0   | 0     | 0    |
| Melongen       | 0.07174    | 0.07873    | 98.24        | 0      | 0      | 0   | 0     | 0.25 |
| ArcaNoae       | 0.07174    | 0.07873    | 98.32        | 0      | 0      | 0   | 0     | 0.25 |
| PSiliDsc       | 0.07174    | 0.07873    | 98.39        | 0      | 0      | 0   | 0     | 0.25 |
| POsTrg         | 0.07174    | 0.07873    | 98.47        | 0      | 0      | 0   | 0     | 0.25 |
| POsRect        | 0.07174    | 0.07873    | 98.55        | 0      | 0      | 0   | 0     | 0.25 |
| POsMola        | 0.07174    | 0.07873    | 98.63        | 0      | 0      | 0   | 0     | 0.25 |
| POsCra         | 0.07174    | 0.07873    | 98.71        | 0      | 0      | 0   | 0     | 0.25 |
| Pophio         | 0.07174    | 0.07873    | 98.79        | 0      | 0      | 0   | 0     | 0.25 |
| BolmOper       | 0.07174    | 0.07873    | 98.87        | 0      | 0      | 0   | 0     | 0.25 |
| PGrDsc         | 0.07174    | 0.07873    | 98.94        | 0      | 0      | 0   | 0     | 0.25 |
| BolmaRug       | 0.07174    | 0.07873    | 99.02        | 0      | 0      | 0   | 0     | 0.25 |
| DisArgP        | 0.07174    | 0.07873    | 99.1         | 0      | 0      | 0   | 0     | 0.25 |
| MpodCanP       | 0.06291    | 0.06904    | 99.17        | 0      | 0      | 0   | 0     | 0.25 |
| Scaphand       | 0.06291    | 0.06904    | 99.24        | 0      | 0      | 0   | 0     | 0.25 |
| PtPect         | 0.06291    | 0.06904    | 99.31        | 0      | 0      | 0   | 0     | 0.25 |
| CLynxP         | 0.06291    | 0.06904    | 99.38        | 0      | 0      | 0   | 0     | 0.25 |
| PtGr           | 0.06291    | 0.06904    | 99.45        | 0      | 0      | 0   | 0     | 0.25 |
| AnMbr          | 0.06291    | 0.06904    | 99.52        | 0      | 0      | 0   | 0     | 0.25 |
| BrcCharo       | 0.06291    | 0.06904    | 99.59        | 0      | 0      | 0   | 0     | 0.25 |
| PRVDsc         | 0.06291    | 0.06904    | 99.65        | 0      | 0      | 0   | 0     | 0.25 |
| POsOv          | 0.06291    | 0.06904    | 99.72        | 0      | 0      | 0   | 0     | 0.25 |
| POsGtt         | 0.06291    | 0.06904    | 99.79        | 0      | 0      | 0   | 0     | 0.25 |
| Hyniapfeifferi | 0.06291    | 0.06904    | 99.86        | 0      | 0      | 0   | 0     | 0.25 |
| CardBip        | 0.06291    | 0.06904    | 99.93        | 0      | 0      | 0   | 0     | 0.25 |
| Donacill       | 0.06291    | 0.06904    | 100          | 0      | 0      | 0   | 0     | 0.25 |

**Table B. List of the shell taxa used as beads and recorded in the database**

| <b>Valid name</b>             |                     | <b>Class</b> | <b>Valid name</b>              |                  | <b>Class</b> |
|-------------------------------|---------------------|--------------|--------------------------------|------------------|--------------|
| <b>Marin shells</b>           |                     |              | <b>Freshwater shells</b>       |                  |              |
| <i>Acanthocardia echinata</i> | Linné, 1758         | Bivalvia     | <i>Anodonta</i> sp.            | Lamarck, 1799    | Bivalvia     |
| <i>Acanthocardia</i>          | Linné, 1758         | Bivalvia     | <i>Margaritifera</i> sp.       | Schumacher, 1816 | Bivalvia     |
| <i>Arca noae</i>              | Linné, 1758         | Bivalvia     | <i>Unio</i> sp.                | Philipsson, 1788 | Bivalvia     |
| <i>Callista chione</i>        | Linné, 1758         | Bivalvia     | <i>Bithynia tentaculata</i>    | Linnaeus, 1758   | Gastropoda   |
| <i>Cardita</i> sp.            | Bruguière, 1792     | Bivalvia     | <i>Esperiana</i> sp.           | Férussac, 1823   | Gastropoda   |
| <i>Cardium</i> sp.            | Linné, 1758         | Bivalvia     | <i>Lithoglyphus naticoides</i> | Pfeiffer, 1828   | Gastropoda   |
| <i>Cerastoderma edule</i>     | Linné, 1758         | Bivalvia     | <i>Melanopsis</i> sp.          | Férussac, 1807   | Gastropoda   |
| <i>Mimachlamys varia</i>      | Linné, 1758         | Bivalvia     | <i>Theodoxus danubialis</i>    | Pfeiffer, 1828   | Gastropoda   |
| <i>Donacilla cornea</i>       | Poli, 1791          | Bivalvia     | <i>Theodoxus fluviatilis</i>   | Linné, 1758      | Gastropoda   |
| <i>Donax trunculus</i>        | Linné, 1758         | Bivalvia     | <b>Terrestrial shells</b>      |                  |              |
| <i>Glycymeris glycymeris</i>  | Linné, 1758         | Bivalvia     | <i>Zebrina detrita</i>         | Müller, 1774     | Gastropoda   |
| <i>Glycymeris</i> sp.         | da Costa, 1778      | Bivalvia     | <i>Discus rotundatus</i>       | Müller, 1774     | Gastropoda   |
| <i>Glycymeris</i>             | Lamarck, 1819       | Bivalvia     | <b>Fossil shells</b>           |                  |              |
| <i>Laevicardium crassum</i>   | Gmelin, 1791        | Bivalvia     | <i>Corbicula convexa</i>       | Deshaves, 1854   | Bivalvia     |
| <i>Macoma balthica</i>        | Linné, 1758         | Bivalvia     | <i>Spisula solida</i>          | Linné, 1758      | Bivalvia     |
| <i>Mytilus edulis</i>         | Linné, 1758         | Bivalvia     | <i>Glycymeris obovatus</i>     | Lamarck, 1805    | Bivalvia     |
| <i>Mytilus</i> sp.            | Linné, 1758         | Bivalvia     | <i>Glycymeris pulvinata</i>    | Lamarck, 1805    | Bivalvia     |
| <i>Ostrea edulis</i>          | Linné, 1758         | Bivalvia     | <i>Pinctada</i> sp.            | Röding, 1798     | Bivalvia     |
| <i>Pecten Maximus</i>         | Linné, 1758         | Bivalvia     | <i>Isognomon maxillata</i>     | Lamarck, 1819    | Bivalvia     |
| <i>Pecten</i> sp.             | Müller, 1776        | Bivalvia     | <i>Ampullina</i> sp.           | Férussac 1822    | Gastropoda   |
| <i>Spisula</i> sp.            | Linné, 1758         | Bivalvia     | <i>Bayania lactea</i>          | Lamarck, 1806    | Gastropoda   |
| <i>Spondylus gaederopus</i>   | Linné, 1758         | Bivalvia     | <i>Granulolabium Plicatum</i>  | Bruguière, 1792  | Gastropoda   |
| <i>Venericardia antiquata</i> | Linné, 1758         | Bivalvia     | <i>Conorbis</i> sp.            | Swainson, 1840   | Gastropoda   |
| <i>Venus verrucosa</i>        | Linné, 1758         | Bivalvia     | <i>Gyraulus trochiformis</i>   | Rafinesque, 1815 | Gastropoda   |
| <i>Aporrhais pespelecani</i>  | Linné, 1758         | Gastropoda   | <i>Gyraulus sulcatus</i>       | Hilgendorf, 1866 | Gastropoda   |
| <i>Architectonica</i> sp.     | Röding, 1798        | Gastropoda   | <i>Keilostoma</i> sp.          | Deshaves, 1850   | Gastropoda   |
| <i>Bolma rugosa</i>           | Linné, 1767         | Gastropoda   | <i>Nerinea</i> sp.             | Defrance, 1825   | Gastropoda   |
| <i>Buccinum undatum</i>       | Linné, 1758         | Gastropoda   | <i>Amalda</i> sp.              | Adams et Adams,  | Gastropoda   |
| <i>Calliostoma zizyphinum</i> | Linné, 1758         | Gastropoda   | <i>Potamides laevisimus</i>    | Sanberger, 1863  | Gastropoda   |
| <i>Cerithium</i> sp.          | Bruguière, 1789     | Gastropoda   | <i>Potamides lamarckii</i>     | Brongniart, 1810 | Gastropoda   |
| <i>Cerithium vulgatum</i>     | Bruguière, 1792     | Gastropoda   | <i>Potamides plicatus</i>      | Brongniart, 1810 | Gastropoda   |
| <i>Charonia lampas</i>        | Linné, 1758         | Gastropoda   | <i>Potamides</i> sp.           | Brongniart, 1810 | Gastropoda   |
| <i>Clanculus corallinus</i>   | Gmelin, 1791        | Gastropoda   | <i>Trophon fusulus</i>         | Brocchi, 1814    | Gastropoda   |
| <i>Columbella rustica</i>     | Linné, 1758         | Gastropoda   | <i>Stenomphalus</i>            | Sandberger, 1853 | Gastropoda   |
| <i>Conus mediterraneus</i>    | Hwass in Bruguière, | Gastropoda   | <i>Theodoxus greagnus</i>      | Thomä, 1845      | Gastropoda   |
| <i>Conus</i> sp.              | Linné, 1758         | Gastropoda   | <i>Tympanotonos</i> sp.        | Linné, 1758      | Gastropoda   |
| <i>Cyclope neritea</i>        | Linné, 1758         | Gastropoda   | <i>Dentalium</i> sp.           | Linné, 1758      | Scaphopoda   |
| <i>Cyclope</i> sp.            | Linné, 1758         | Gastropoda   | <i>Distrupa</i> sp.            | Berkeley, 1835   | Canalipalpat |
| <i>Euspira catena</i>         | da Costa 1778       | Gastropoda   | <i>Protula</i> sp.             | Risso, 1826      | Polychaeta   |
| <i>Euspira pulchella</i>      | Risso, 1826         | Gastropoda   |                                |                  |              |
| <i>Euspira</i> sp.            | Risso, 1826         | Gastropoda   |                                |                  |              |
| <i>Gibberula miliaria</i>     | Linné, 1758         | Gastropoda   |                                |                  |              |
| <i>Haliotis</i> sp.           | Linné, 1758         | Gastropoda   |                                |                  |              |
| <i>Homalopoma</i>             | Linné, 1758         | Gastropoda   |                                |                  |              |
| <i>Littorina fabalis</i>      | Turton, 1825        | Gastropoda   |                                |                  |              |
| <i>Littorina littorea</i>     | Linné, 1758         | Gastropoda   |                                |                  |              |
| <i>Littorina obtusata</i>     | Linné, 1758         | Gastropoda   |                                |                  |              |
| <i>Littorina</i> sp.          | Férussac, 1822      | Gastropoda   |                                |                  |              |
| <i>Luria lurida</i>           | Linné, 1758         | Gastropoda   |                                |                  |              |
| <i>Marginella</i> sp.         | Lam, 1799           | Gastropoda   |                                |                  |              |
| <i>Mitra</i> sp.              | Linné, 1758         | Gastropoda   |                                |                  |              |
| <i>Nassarius comiculum</i>    | Olivi, 1792         | Gastropoda   |                                |                  |              |
| <i>Nassarius cuvierii</i>     | Payraudeau, 1826    | Gastropoda   |                                |                  |              |
| <i>Nassarius gibbosulus</i>   | Linné, 1758         | Gastropoda   |                                |                  |              |
| <i>Nassarius incrassatus</i>  | Ström, 1768         | Gastropoda   |                                |                  |              |
| <i>Nassarius mutabilis</i>    | Linné, 1758         | Gastropoda   |                                |                  |              |
| <i>Nassarius nitidus</i>      | Jeffreys, 1867      | Gastropoda   |                                |                  |              |
| <i>Nassarius reticulatus</i>  | Linné, 1758         | Gastropoda   |                                |                  |              |
| <i>Nassarius pfeifferi</i>    | Philippi, 1844      | Gastropoda   |                                |                  |              |
| <i>Natica</i> sp.             | Scopoli, 1777       | Gastropoda   |                                |                  |              |
| <i>Natica</i>                 | Gmelin, 1791        | Gastropoda   |                                |                  |              |
| <i>Nerita tricarinata</i>     | Linné, 1758         | Gastropoda   |                                |                  |              |
| <i>Nuccella lapillus</i>      | Linné, 1758         | Gastropoda   |                                |                  |              |
| <i>Ocenebra erinaceus</i>     | Linné, 1758         | Gastropoda   |                                |                  |              |
| <i>Osilinus</i> sp.           | Lamarck, 1822       | Gastropoda   |                                |                  |              |
| <i>Osilinus turbinatus</i>    | Born, 1778          | Gastropoda   |                                |                  |              |
| <i>Patella caerulea</i>       | Linné, 1758         | Gastropoda   |                                |                  |              |
| <i>Patella</i> sp.            | Linné, 1758         | Gastropoda   |                                |                  |              |
| <i>Patella vulgata</i>        | Linné, 1758         | Gastropoda   |                                |                  |              |
| <i>Phalium saburon</i>        | Bruguière, 1792     | Gastropoda   |                                |                  |              |
| <i>Pisania striata</i>        | Gmelin, 1791        | Gastropoda   |                                |                  |              |
| <i>Ruditapes</i> sp.          | Linné, 1758         | Gastropoda   |                                |                  |              |
| <i>Scaphander lignarius</i>   | Linné, 1758         | Gastropoda   |                                |                  |              |
| <i>Stramonita haemastom</i>   | Linné, 1767         | Gastropoda   |                                |                  |              |
| <i>Strombus</i> sp.           | Linné, 1758         | Gastropoda   |                                |                  |              |
| <i>Trivia monacha</i>         | da Costa 1778       | Gastropoda   |                                |                  |              |
| <i>Trivia</i> sp.             | da Costa 1778       | Gastropoda   |                                |                  |              |
| <i>Trophonopsis muricatus</i> | Montagu, 1803       | Gastropoda   |                                |                  |              |
| <i>Turritella communis</i>    | Risso, 1826         | Gastropoda   |                                |                  |              |
| <i>Turritella</i> sp.         | Lamarck, 1799       | Gastropoda   |                                |                  |              |

**Table C. List of the vertebrate bones and teeth recorded in the database (I: incisor, C: canine, M: molar, indet: indeterminate)**

| Family                      | Skeletal part              |
|-----------------------------|----------------------------|
| <b>Bovidae</b>              |                            |
| <i>Bos</i> sp.              | I                          |
| <i>Capra ibex</i>           | I                          |
| <i>Caprinae</i> indet.      | I                          |
| <b>Cervidae</b>             |                            |
| <i>Alces alces</i>          | I, C, PM, M, mandible      |
| <i>Capreolus capreolus</i>  | I, C                       |
| <i>Cervus elaphus</i>       | I, C, M, antler, phalanx   |
| <b>Suidae</b>               |                            |
| <i>Sus scrofa</i>           | I, C, PM                   |
| <b>Equidae</b>              |                            |
| <i>Equus ferus</i>          | I, C                       |
| <b>Castoridae</b>           |                            |
| <i>Castor fiber</i>         | I, M, astragalus, mandible |
| <b>Mustelidae</b>           |                            |
| <i>Lutra lutra</i>          | C, M                       |
| <i>Martes martes</i>        | C                          |
| <i>Meles meles</i>          | I, C                       |
| <i>Mustela putorius</i>     | C                          |
| <b>Felidae</b>              |                            |
| <i>Felis silvestris</i>     | C, astragalus              |
| <i>Lynx</i> sp.             | C                          |
| <b>Canidae</b>              |                            |
| <i>Vulpes vulpes</i>        | I, C                       |
| <i>Canis familiaris</i>     | I, C, M                    |
| <i>Canis lupus</i>          | I, C, M                    |
| <b>Ursidae</b>              |                            |
| <i>Ursus arctos</i>         | I, C                       |
| <b>Phocidae</b>             |                            |
| indet                       | I, C                       |
| <b>Cyprinidae</b>           |                            |
| <i>Rutilus</i> sp.          | Pharyngeal teeth           |
| <b>Hominidae</b>            |                            |
| <i>Homo sapiens sapiens</i> | I, C, M                    |
| <b>Leporidae</b>            |                            |
| indet                       | long bone                  |
| <b>Bird</b>                 | indet                      |
| <b>Fish</b>                 | indet                      |
|                             | <i>Rutilus</i> sp.         |
|                             | Shark                      |
| <b>Tortoise</b>             | <i>Emys orbicularis</i>    |
|                             | vertebra                   |
|                             | pharyngeal tooth           |
|                             | tooth                      |
|                             | scale                      |

**Table D. List of the mineral raw materials recorded in the database**

| Type of mineral raw material | Sub-types                                                                                            |
|------------------------------|------------------------------------------------------------------------------------------------------|
| Clay                         |                                                                                                      |
| Limestone                    |                                                                                                      |
| Marble                       |                                                                                                      |
| Soapstone                    |                                                                                                      |
| Schist                       |                                                                                                      |
| Sandstone                    |                                                                                                      |
| Siltstone                    |                                                                                                      |
| Quartz                       |                                                                                                      |
| <b>Grey stone</b>            |                                                                                                      |
| <b>Green stone</b>           | Serpentine<br>Jade<br>Amphibolite<br>Hornblendite<br>Pyroxenite<br>Phyllite<br>Nephrite<br>Variscite |
| <b>Black stone</b>           | Lignite<br>Ophiolite                                                                                 |
| <b>Granitic rock</b>         |                                                                                                      |
| <b>Pebble</b>                | Indet                                                                                                |

**Table E. List of the bead-types recorded in the database**

| Bead-type | Type description         |
|-----------|--------------------------|
| Acantho   | Acanthocardia sp.        |
| Ampulli   | Ampullina sp.            |
| AnCalc    | Limestone ring           |
| AnCelAnt  | Red deer antler ring     |
| AnMbr     | Marble ring              |
| AnOs      | Bone ring                |
| AnSchi    | Schist ring              |
| AnShell   | Shell ring               |
| Antalis   | Antalis sp.              |
| Aporrhai  | Aporrhais pespelecani    |
| ArcaNoae  | Arca noae                |
| AstrCasP  | Beaver Astragalus        |
| AstrFelP  | Felis astragalus         |
| Bayania   | Bayania sp.              |
| Bithynia  | Bithynia tentaculata     |
| BolmaRug  | Bolma rugosa             |
| BolmOper  | Bolma rugosa opercule    |
| BrcAntl   | Red deer antler bracelet |
| BrcArg    | Clay bracelet            |
| BrcCalc   | Limestone bracelet       |
| BrcCharo  | Charonia lampas bracelet |
| BrcGly    | Glycymeris bracelet      |
| BrcGres   | Sandstone bracelet       |
| BrcMbr    | Marble bracelet          |
| BrcOs     | Bone bracelet            |
| BrcOsili  | Osilinus bracelet        |
| BrcRn     | Black stone bracelet     |
| BrcRv     | Green stone bracelet     |
| BrcSchi   | Schist bracelet          |
| BrcSpond  | Spondylus bracelet       |
| BrcVC     | Green stone bracelet     |
| BrcVCTrP  | Green stone bracelet     |

| Table S5. cont. |                              |
|-----------------|------------------------------|
| Bead-type       | Type description             |
| Buccinum        | Buccinum undatum             |
| CAlcP           | Elk canine                   |
| Calliost        | Calliostoma zizyphinum       |
| Callista        | Callista chione              |
| CCanP           | Canidae canine               |
| CCelP           | Red deer canine              |
| CEqP            | Horse canine                 |
| Cerast          | Cerastoderma sp.             |
| Cerith          | Cerithium sp.                |
| CFelP           | Felis canine                 |
| Charo           | Charonia lampas              |
| Chlamys         | Chlamys varia                |
| Clancu          | Clanculus corallinus         |
| CLutP           | Otter canine                 |
| CLynxP          | Lynx Canine                  |
| CMartP          | Marten canine                |
| CMelesP         | Badger canine                |
| Columbel        | Columbella rustica           |
| Conus           | Conus sp.                    |
| Corbicul        | Corbicula convexa            |
| COTTp           | Otter canine                 |
| CPhoP           | Seal canine                  |
| CPutP           | Polecat canine               |
| CSusP           | Wild boar canine             |
| CUrsP           | Bear canine                  |
| CVulP           | Fox canine                   |
| Cyclope         | Cyclope neritea              |
| Cypraea         | Cypraea sp.                  |
| dentRequin      | Shark tooth                  |
| DisArgP         | Discoïd clay bead            |
| DisNacrP        | Discoïd mother of pearl bead |
| DisOsP          | Discoïd bone bead            |
| DisStoP         | Discoïd stone bead           |
| Donacill        | Donacilla cornea             |
| EmOrbi          | Emys orbicularis scale       |
| EnaDetrita      | Ena detrita                  |
| Euspira         | Euspira catena               |
| Fagotia         | Fagotia                      |
| Gibberul        | Gibberula miliaria           |
| Gly             | Glycymeris sp.               |
| Granulo         | Granulolabium Plicatum       |
| Gyraulus        | Gyraulus sp.                 |
| Haliotis        | Haliotis sp.                 |
| Hyniapfeifferi  | Hynia pfeifferi              |
| IAlcP           | Elk incisor                  |
| IBosP           | Bovidae incisor              |
| ICanP           | Canidae incisor              |
| ICaprP          | Ibex incisor                 |
| ICastP          | Beaver incisor               |
| ICastPI         | Beaver incisor               |
| ICelP           | Red deer incisor             |
| IEquP           | Horse incisor                |
| IHumP           | Human incisor                |
| ILagomP         | Lagomorph bone               |
| IMelP           | Badger incisor               |
| IPhoP           | Seal incisor                 |
| IRoeDeerP       | Roe deer incisor             |
| ISusP           | Wild boar incisor            |
| IUrsP           | Bear incisor                 |
| IVulpP          | Fox incisor                  |
| Laevicar        | Laevicardium sp.             |
| Lithogly        | Lithoglyphus naticoides      |
| Littor          | Littorina sp.                |
| Luria           | Luria lurida                 |
| Macoma          | Macoma balthica              |
| MAlcP           | Elk molar                    |
| MandiAlcPerf    | Elk mandible                 |
| MandiCastP      | Beaver mandible              |
| Marginel        | Marginella sp.               |

| Table S5. cont. |                                                         |
|-----------------|---------------------------------------------------------|
| Bead-type       | Type description                                        |
| MCanP           | Canidae molar                                           |
| MCastP          | Beaver molar                                            |
| McelP           | Red deer molar                                          |
| Melanopsis      | Melanopsis sp.                                          |
| Melongen        | Melongena sp.                                           |
| MHumP           | Human molar                                             |
| MLutrGr         | Otter molar                                             |
| MPhoP           | Seal molar                                              |
| MpodCanP        | Perforated Canidae metapod                              |
| Mytilus         | Mytilus sp.                                             |
| nassariu        | Nassarius sp.                                           |
| Natica          | Natica sp.                                              |
| Nerinea         | Nerinea                                                 |
| Nerita          | Nerita tricarinata                                      |
| Nucella         | Nucella lapillus                                        |
| Ocenebra        | Ocenebra erinaceus                                      |
| Osilinus        | Osilinus sp.                                            |
| Ostrea          | Ostrea sp.                                              |
| PAmb            | Amber bead                                              |
| PArgRd          | Round clay bead                                         |
| PArgTub         | Tubular clay bead                                       |
| Patella         | Patella sp.                                             |
| PCalCar         | Square limestone bead                                   |
| PCalDsc         | Discoïd limestone bead                                  |
| PCalGtt         | Limestone bead with circular section and curved profile |
| PCalOv          | Oval limestone bead                                     |
| PCalTub         | Tubular limestone bead                                  |
| PCastP          | Beaver incisor                                          |
| Pecten          | Pecten sp.                                              |
| PendCastP       | Beaver bone                                             |
| PGalBic         | Pebble pendant                                          |
| PGalDsc         | Discoïd stone bead                                      |
| PGrDsc          | Discoïd sandstone bead                                  |
| PhalCelP        | Red deer phalanx                                        |
| Phalium         | Phalium saburon                                         |
| PhalOursgorge   | Bear phalanx                                            |
| Pirenella       | Pirenella sp.                                           |
| Pisania         | Pisania striata                                         |
| PICalcAt        | Limestone plate                                         |
| PLignDsc        | Discoïdal black stone bead                              |
| PIOs            | Bone plate                                              |
| PISpoAt         | Spondylus plate                                         |
| PMAIcP          | Elk premolar                                            |
| Pmbr            | Round amber bead                                        |
| PMbrDsc         | Discoïd marble bead                                     |
| PMSusP          | Wild boar premolar                                      |
| PMudDsc         | Discoïdal clay bead                                     |
| PMUrsGr         | Grooved bear molar                                      |
| Pnéphrite       | Discoïd black stone bead                                |
| Pophio          | Discoïd black stone bead                                |
| PosBic          | Biconic bone bead                                       |
| POsCra          | Bone bead red deer canine shaped                        |
| POsD            | Bone pendant                                            |
| POsDsc          | Discoïd bone bead                                       |
| POsGtt          | Bone bead with circular section and curved profile      |
| POsMola         | Bone bead mammal molar shaped                           |
| POsOv           | Oval bone bead                                          |
| POsRect         | Rectangular bone bead                                   |
| POsTrg          | Trivangular Bone Bead                                   |
| POsTrz          | Trapezoidal shell bead                                  |
| POsTub          | Tubular bone bead                                       |
| Potamide        | Potamides sp.                                           |
| PRVBout         | Round green stone bead                                  |
| PRVDsc          | Discoïd green stone bead                                |
| PRVOv           | Oval green stone bead                                   |
| PRVTub          | Tubular green stone bead                                |
| PSchiDsc        | Discoïd schist bead                                     |
| PSerpDsc        | Discoïd green stone bead                                |
| PSheCrrBi       | Square shell bead                                       |



| <b>Table S5. cont.</b> |                                                     |
|------------------------|-----------------------------------------------------|
| <b>Bead-type</b>       | <b>Type description</b>                             |
| PSheCrrMI              | Square shell bead                                   |
| PSheDsc                | Discoïd shell bead                                  |
| PSheGtt                | Shell bead with circular section and curved profile |
| PSheOv                 | Oval shell bead                                     |
| PSheOvBi               | Bi-perforated oval shell bead                       |
| PSheRd                 | Round shell bead                                    |
| PSheRectBip            | Restangular shell bead                              |
| PSheTrg                | Triangular shell bead                               |
| PSheTrz                | Trapezoidal shell bead                              |
| PSiliDsc               | Discoïd siltstone bead                              |
| PSpoTub                | Tubular spondylus bead                              |
| Psteatdsc              | Discoïd soapstone bead                              |
| PStoDsc                | Discoïd stone bead                                  |
| PStoTub                | Tubular limestone bead                              |
| PSttDsc                | Discoïd soapstone bead                              |
| PtAmb                  | Amber pendant                                       |
| PtAnt                  | Red deer antler pendant                             |
| PtCal                  | Limestone pendant                                   |
| PtGal                  | Pebble pendant                                      |
| PtGly                  | Glycymaris pendant                                  |
| PtGr                   | Sandstone pendant                                   |
| PtMbr                  | Marble pendant                                      |
| PtOs                   | Bone pendant                                        |
| PtPect                 | Pecten pendant                                      |
| PtQrtz                 | Quartz pendant                                      |
| PtSchi                 | Schist pendant                                      |
| PtSpo                  | Arciform Spondylus pendant                          |
| PtSto                  | Stone pendant                                       |
| PtStt                  | Soapstone pendant                                   |
| PtUnio                 | Unio sp.                                            |
| PVascOv                | Oval green stone bead                               |
| Scaphand               | Scaphander lignarius                                |
| spisula                | Spisula solida                                      |
| Spolnc                 | Notched Spondylus                                   |
| Spond                  | Spondylus sp.                                       |
| Stenomph               | Stenomphalus                                        |
| Stramoni               | Stramonita haemastoma                               |
| Strombus               | Strombus sp.                                        |
| Stud                   | Clay ear stud                                       |
| TGardon                | Rutilus pharyngeal tooth                            |
| Theodoxu               | Theodoxus sp.                                       |
| TmamSeaGr              | Grooved Seal canine                                 |
| Trivia                 | Trivia sp.                                          |
| Trophon                | Trophonopsis muricatus                              |
| Turritel               | Turritella sp.                                      |
| Tympano                | Tympanotonos sp.                                    |
| Unio                   | Unio sp.                                            |
| Veneri                 | Venericardia antiquata                              |
| Venus                  | Venus verrucosa                                     |

**Table F. List of the bead-types present in each of the archaeological cultures**

| Archaeological culture | Bead-types                                                                                                                                                                                                                                                                                                                                                                                                                                                                                                                                                                                                       |
|------------------------|------------------------------------------------------------------------------------------------------------------------------------------------------------------------------------------------------------------------------------------------------------------------------------------------------------------------------------------------------------------------------------------------------------------------------------------------------------------------------------------------------------------------------------------------------------------------------------------------------------------|
| 1                      | AnOs, Antalis, BrcArg, BrcCalc, BrcGres, BrcSchi, Cerast, CSusP, Mytilus, PCalDsc, PCalGtt, PSheDsc, PSheTrz, PSpoTub, spisula, Spolnc, Spond, Turritel, Tympano, Unio, Veneri                                                                                                                                                                                                                                                                                                                                                                                                                                   |
| 2                      | AnOs, Antalis, BrcArg, BrcCalc, BrcGres, BrcRn, BrcRv, BrcSchi, CSusP, Natica, Nucella, PCalDsc, PCalTub, POsTub, PSheDsc, PSheTrz, PSpoTub, PtGal, Unio                                                                                                                                                                                                                                                                                                                                                                                                                                                         |
| 3                      | AnOs, Antalis, BrcGly, PCalDsc, PCalTub, PSheDsc, PSheOv, PSheRd, PSpoTub, PtOs, Spolnc, Spond, Theodoxu                                                                                                                                                                                                                                                                                                                                                                                                                                                                                                         |
| 4                      | AnOs, Antalis, BrcRv, BrcSchi, EnaDetritra, Nucella, PCalDsc, Pecten, POsTub, PSheDsc, PSheOv, PSheTrg                                                                                                                                                                                                                                                                                                                                                                                                                                                                                                           |
| 5                      | AnOs, AnSchi, Antalis, BrcArg, BrcCalc, BrcGly, BrcRv, BrcSchi, BrcSpond, BrcVC, BrcVCTrP, CCanP, CCeIP, Cerith, CSusP, Cyclope, Littor, Natica, Nerinea, Nucella, PCalCar, PCalDsc, PLignDsc, PosBic, POsTrz, PSheDsc, PSheOv, PSheTrg, PSheTrz, PSpoTub, PtGal, Spolnc, Spond, Trivia, Veneri                                                                                                                                                                                                                                                                                                                  |
| 6                      | Antalis, BrcAntl, BrcCalc, BrcRv, BrcSchi, CCanP, CCeIP, Corbicul, CSusP, Gly, Granulo, Nerita, PCalDsc, PLignDsc, Potamide, PSheCrrBi, PSheCrrMI, PSheDsc, PSheGtt, PSheOv, PtUnio, Spond, Stenomph, Theodoxu, Unio                                                                                                                                                                                                                                                                                                                                                                                             |
| 7                      | Antalis, BrcSpond, CCeIP, Columbel, CSusP, CVulP, Lithogly, PCalTub, Pmbr, Pnéphrite, PSheDsc, PSheGtt, PSheOv, PSheRectBip, PSheTrg, PSpoTub, PStoTub, PtSpo, Spolnc, Spond, Theodoxu, Unio                                                                                                                                                                                                                                                                                                                                                                                                                     |
| 8                      | Antalis, BrcMbr, BrcOs, BrcSpond, BrcVC, Gly, PISpoAt, Potamide, PSheOv, PSpoTub, PtSpo, Spolnc, Spond                                                                                                                                                                                                                                                                                                                                                                                                                                                                                                           |
| 9                      | AnOs, Antalis, BrcSpond, CCeIP, Columbel, EnaDetritra, Gly, Natica, Nucella, PCalCar, PCalTub, PSheDsc, PSheOv, PSheOvBi, PSheTrg, PSpoTub, Spolnc, Spond, Trivia, Unio, Veneri                                                                                                                                                                                                                                                                                                                                                                                                                                  |
| 10                     | AnShell, Antalis, BrcOsili, BrcSpond, PArgRd, PArgTub, PGalBic, PGalDsc, PMbrDsc, POsTub, PRVBout, PRVOv, PRVTub, PSchiDsc, PSerpDsc, PSheDsc, PStoDsc, PSttDsc, PtMbr, PtSpo, PtSto, PtStt, Spond, Stud                                                                                                                                                                                                                                                                                                                                                                                                         |
| 11                     | Acantho, AnShell, Antalis, ArcaNoae, BolmaRug, BolmOper, BrcGly, BrcSpond, CCanP, CCeIP, Cerast, Cerith, Charo, Chlamys, Columbel, Conus, CSusP, CUrsP, CVulP, Cyclope, Cypraea, DisArgP, Gly, IBosP, ICaprP, MCanP, Melongen, Osilinus, PArgTub, Patella, PCalDsc, PCalOv, PCalTub, Pecten, PGRdsc, Phalium, Pisania, PIOs, Pophio, POsCra, POsMola, POsRect, POsTrg, POsTub, PSchiDsc, PSerpDsc, PSheDsc, PSheOv, PSiliDsc, PStoTub, PSttDsc, PtCal, PtOs, PtQrtz, PtSpo, Spolnc, Spond, Stramoni, Strombus, Trivia                                                                                            |
| 12                     | Acantho, AnCelAnt, AnMbr, AnOs, AnSchi, AnShell, Antalis, Aporrhai, BrcCalc, BrcCharo, BrcGly, BrcMbr, BrcOsili, BrcRn, BrcRv, BrcSchi, CardBip, CCanP, CCeIP, Cerast, Cerith, CFelP, Charo, CLynxP, Columbel, Conus, CSusP, CVulP, Cyclope, Cypraea, DisOsP, DisStoP, Donacil, Gly, Haliotis, Hyniapfeifferi, Luria, Melanopsis, MpodCanP, Mytilus, nassariu, PArgTub, PCalDsc, PCalGtt, PCalOv, Pecten, Phalium, PIOs, POsDsc, POsGtt, POsOv, POsTub, PRVDsc, PRVOv, PSheDsc, PSheGtt, PSheOv, Psteatdsc, PStoDsc, PSttDsc, PtGly, PtGr, PtOs, PtPect, Scaphand, Stramoni, Strombus, Theodoxu, Trivia, Trophon |
| 13                     | Acantho, AnCalc, AnCelAnt, AnOs, AnShell, Antalis, BrcCalc, BrcGly, BrcMbr, BrcSchi, CCeIP, Cerast, Cerith, Charo, CMelesP, Columbel, Conus, CSusP, CVulP, DisNacrP, DisOsP, DisStoP, Gibberul, Gly, ICeIP, ISusP, Luria, Marginel, nassariu, Patella, PCalDsc, PCalGtt, Pecten, PIOs, POsDsc, POsTub, PRVOv, PSheDsc, PSheGtt, PSheOv, Psteatdsc, PStoDsc, PtCal, PtGal, PtGly, PtOs, PtSchi, PVascOv, Theodoxu,, Trivia                                                                                                                                                                                        |
| 14                     | BrcGly, BrcSpond                                                                                                                                                                                                                                                                                                                                                                                                                                                                                                                                                                                                 |
| 15                     | Cyclope, Lithogly, Melanopsis, PCalDsc, PSheRd, TGardon                                                                                                                                                                                                                                                                                                                                                                                                                                                                                                                                                          |
| 16                     | Acantho, CSusP, Littor, Nucella, Ostrea, Patella, Pecten, PtGal, Trivia                                                                                                                                                                                                                                                                                                                                                                                                                                                                                                                                          |
| 17                     | Ampulli, Antalis, Bayania, Calliost, CCanP, CCeIP, Cerast, Cerith, CMelesP, Columbel, Conus, CVulP, Euspira, Fagotia, Gly, ICeIP, Laeivicar, McelP, Mytilus, nassariu, Natica, Ocenebra, Ostrea, Patella, Pecten, PhalCelP, Phalium, Pirenella, Pisania, Potamide, PtAnt, PtGal, PtOs, spisula, Theodoxu, Unio, Venus                                                                                                                                                                                                                                                                                            |
| 18                     | CCeIP, Cerast, Columbel, CVulP, Gyraulus, Lithogly, Macoma, Pirenella, POsTub, Potamide, PtOs, TGardon                                                                                                                                                                                                                                                                                                                                                                                                                                                                                                           |
| 19                     | Littor, nassariu, Natica, PtOs, Trivia                                                                                                                                                                                                                                                                                                                                                                                                                                                                                                                                                                           |
| 20                     | Aporrhai, CCeIP, ICeIP, Littor, nassariu, PMudDsc, POsTub, PSchiDsc, PStoDsc, PtAmb, Trivia                                                                                                                                                                                                                                                                                                                                                                                                                                                                                                                      |
| 21                     | CCeIP, Cerith, Columbel, Cyclope, Lithogly, Luria, nassariu, Theodoxu                                                                                                                                                                                                                                                                                                                                                                                                                                                                                                                                            |
| 22                     | Antalis, Callista, CCeIP, Cerast, Cerith, Columbel, Littor, nassariu, Natica, Osilinus, Pecten, Theodoxu, Trivia                                                                                                                                                                                                                                                                                                                                                                                                                                                                                                 |
| 23                     | Antalis, CCeIP, Cerith, Clancu, Columbel, Cyclope, Gly, nassariu, PStoDsc, PtGly, Spond, Theodoxu, Trivia                                                                                                                                                                                                                                                                                                                                                                                                                                                                                                        |
| 24                     | Columbel, nassariu, Natica, Pecten                                                                                                                                                                                                                                                                                                                                                                                                                                                                                                                                                                               |
| 25                     | Antalis, Cerith, Columbel, Gly, Pecten                                                                                                                                                                                                                                                                                                                                                                                                                                                                                                                                                                           |
| 26                     | Antalis, Columbel, Cyclope, Gly                                                                                                                                                                                                                                                                                                                                                                                                                                                                                                                                                                                  |
| 27                     | Antalis, Columbel, Cyclope, Gly, PtGal                                                                                                                                                                                                                                                                                                                                                                                                                                                                                                                                                                           |
| 28                     | Amalda, Ampulli, Antalis, Bayania, CCeIP, Cerast, Conorbis, Gly, Keilosto, Littor, nassariu, Nucella, Potamide                                                                                                                                                                                                                                                                                                                                                                                                                                                                                                   |
| 29                     | Ampulli, Antalis, Bithynia, CCeIP, Cerast, Cerith, Columbel, Conus, CVulP, Cyclope, Gyraulus, Laeivicar, Lithogly, Littor, MHumP, nassariu, Ocenebra, Patella, Pecten, PhalCelP, PCalcAt, PSheTrg, PStoTub, PtGal, PtOs, PtQrtz, PtSchi, TGardon, Theodoxu, TmamSeaGr, Trivia                                                                                                                                                                                                                                                                                                                                    |
| 30                     | Acantho, Antalis, Buccinum, CCeIP, Cerast, Chlamys, Cyclope, Cypraea, Euspira, Gly, Haliotis, Laeivicar, Littor, nassariu, Nucella, Ocenebra, Ostrea, Patella, Pecten, Trivia, Trophon                                                                                                                                                                                                                                                                                                                                                                                                                           |
| 31                     | CCanP, CEqP, CLutP, CMartP, CMelesP, CPhoP, CSusP, CUrsP, CVulP, IAlcP, IBosP, ICanP, ICeIP, IEquP, IPHoP, ISusP, IUrsP, MCanP, PAmb, PendCastP, PMAlcP, PMSusP, PtAmb                                                                                                                                                                                                                                                                                                                                                                                                                                           |
| 32                     | AstrCasP, AstrFelP, CCanP, CEqP, CLutP, CMartP, CMelesP, COttP, CSusP, CVulP, EmOrbi, IAlcP, IBosP, ICanP, ICastP, ICeIP, IEquP, ISusP, MAlcP, MCastP, PMAlcP, PMSusP, PtOs                                                                                                                                                                                                                                                                                                                                                                                                                                      |
| 33                     | CCanP, CMartP, IAlcP, ICanP, ICastP, IMelP, IUrsP, MCastP, MLutrGr, PMUrsGr, POsD                                                                                                                                                                                                                                                                                                                                                                                                                                                                                                                                |
| 34                     | CAlcP, CCanP, CMartP, CMelesP, CPhoP, CUrsP, CVulP, IAlcP, IBosP, ICastP, ICeIP, ISusP, PAmb, POsTub, PtAmb                                                                                                                                                                                                                                                                                                                                                                                                                                                                                                      |
| 35                     | CSusP, IAlcP, IBosP, ICeIP, ISusP                                                                                                                                                                                                                                                                                                                                                                                                                                                                                                                                                                                |
| 36                     | CAlcP, CCeIP, CSusP, CUrsP, IAlcP, IBosP, ICeIP, IHumP, ISusP, MPhoP, Theodoxu                                                                                                                                                                                                                                                                                                                                                                                                                                                                                                                                   |

| Table S6. cont.        |                                                                                                                                                                                                 |
|------------------------|-------------------------------------------------------------------------------------------------------------------------------------------------------------------------------------------------|
| Archaeological culture | Bead-types                                                                                                                                                                                      |
| 37                     | IAlcP, ICeIP, PtOs                                                                                                                                                                              |
| 38                     | CCeIP, CLutP, IAlcP, ICanP, ICeIP, Pamb, PtOs                                                                                                                                                   |
| 39                     | BrcOs, CCeIP, ICaprP, ICeIP, ISusP, Pamb, PtAmb                                                                                                                                                 |
| 40                     | CCeIP, ICeIP, ISusP                                                                                                                                                                             |
| 41                     | CCeIP, ICeIP, PtAmb                                                                                                                                                                             |
| 42                     | CCeIP, IAlcP, IBosP                                                                                                                                                                             |
| 43                     | ISusP                                                                                                                                                                                           |
| 44                     | BrcSchi, Pamb, PtAmb, PtSchi                                                                                                                                                                    |
| 45                     | CCanP, CursP, IAlcP, IBosP, ICanP, ICastP, ICastPl, ICeIP, ILagomP, IRoeDeerP, ISusP, IVulpP, MandiAlcPerf, MandiCastP, MCanP, PhalOursgorge, PIOs, POsTub, PtGal, PtOs, PtQrtz                 |
| 46                     | CAIcP, CCanP, CCeIP, CPhoP, CSusP, CursP, dentRequin, IAlcP, IBosP, ICeIP, IEquP, IRoeDeerP, ISusP, MAIcP, MceIP, MHumP, Pamb, PCastP, PendCastP, POsTub, Theodoxu                              |
| 47                     | CAIcP, CCanP, CCeIP, CFelP, CLutP, CMartP, CMelesP, CPutP, CSusP, CursP, CVulp, IAlcP, IBosP, ICanP, ICaprP, ICastP, ICeIP, IEquP, IHumP, IMelP, ISusP, IVulpP, MHumP, MPhoP, Pamb, PtAnt, PtOs |
| 48                     | IAlcP, ICastP                                                                                                                                                                                   |

## SUPPORTING DATASET

**DATASET S1 (Separate Excel sheet). Database of the Mesolithic and Early Neolithic European sites used in the analysis.**

## REFERENCES FOR SUPPORTING INFORMATION

1. Dubouloz J. Datation absolue du premier Néolithique du Bassin parisien : complément et relecture des données RRBp et VSG. *Bull Soc Prehist fr.* 2003; 100: 671–689.
2. Constantin C, Ilett M. Le Néolithique de Villeneuve- St-Germain. Vallée de l’Aisne : cinq années de fouilles protohistoriques. *Rev Archéologique Picardie Numéro spécial Numéro spécial.* 1982; 1: 121–127.
3. Dubouloz J. Impacts of the Neolithic Demographic Transition on Linear Pottery Culture Settlement. In: Bocquet-Appel J-P, Bar-Yosef O, editors. *The Neolithic Demographic Transition and its Consequences.* Netherlands: London: Springer Ferlag; 2008. pp. 207–235. Available: [http://dx.doi.org/10.1007/978-1-4020-8539-0\\_9](http://dx.doi.org/10.1007/978-1-4020-8539-0_9).
4. Allard P. The Mesolithic-Neolithic transition in the Paris Basin: a review. *Going Over: the Mesolithic-Neolithic Transition in North-West Europe.* Oxford: Alasdair Whittle and Vicki Cummings; 2007. pp. 209–222.
5. Denaire A. Radiocarbon Dating of the Western European Neolithic: Comparison of the Dates on Bones and Dates on Charcoals. *Radiocarb.* 2001; 51: 657-674. Available: <https://journals.uair.arizona.edu/index.php/radiocarbon/article/view/3524>.
6. Reingruber A. Early Neolithic settlement patterns and exchange networks in the Aegean. *Doc Prehist.* 2011; 38: 291–305.

7. Manen C, Philippe S. Chronique radiocarbone de la néolithisation en Méditerranée nord-occidentale. *Bull Société Préhistorique Fr.* 2003; 100: 479–504.
8. Willigen S van, Hajdas I, Bonani G. New Radiocarbon Dates for the Early Neolithic of the Western Mediterranean. *Radiocarb.* 2011; 51: 831-838. Available: <https://journals.uair.arizona.edu/index.php/radiocarbon/article/view/3537>.
9. Biagi P, Spataro M. New observation on the radiocarbon chronology of the starcevo-cris and koros cultures. *Prehist Archaeol E Anthropol Theory Educ Rep Prehist Res Proj.* 2005; 06-lug: 35–40.
10. Bonsall C, Cook GT, Hedges R, Higham THF, Pickard C, Radovanovic I. Radiocarbon and stable isotope evidence of dietary change from the Mesolithic to the Middle Ages in the Iron Gates : new results from Lepenski Vir. *Radiocarbon.* 2004; 46: 293–300.
11. Bonsall C. The Mesolithic of the Iron Gates. In: Bailey G, Spikins P, editors. *Mesolithic Europe.* Cambridge: Cambridge University Press; 2008. pp. 238–279.
12. Bonsall C. “The ‘Obanian problem’: coastal adaptation in the Mesolithic of western Scotland.” In: Pollard T, Morrison A, editors. *The Early Prehistory of Scotland.* Edinburgh: Edinburgh University Press; 1996. pp. 183–197.
13. Valdeyron N. *Le Sauveterrien : cultures et sociétés méso-lithiques dans la France du sud durant le X<sup>e</sup> et le IX<sup>e</sup> millénaire BP [mémoire de doctorat nouveau régime, UTM].* Toulouse: Toulouse le Mirail, 1994.
14. Kind C-J. Transport of lithic raw material in the Mesolithic of southwest Germany. *J Anthropol Archaeol.* 2006; 25: 213–225.
15. Gutiérrez-Zugasti I, Andersen SH, Araújo AC, Dupont C, Milner N, Monge-Soares AM. Shell midden research in Atlantic Europe: State of the art, research problems and perspectives for the future. *Shell Midden Res Interdiscip Agenda Quat Soc Sci.* 2011; 239: 70–85. doi:10.1016/j.quaint.2011.02.031.
16. Schulting RJ, Richards MP. Dogs, Ducks, Deer and Diet: New Stable Isotope Evidence on Early Mesolithic Dogs from the Vale of Pickering, North-east England. *J Archaeol Sci.* 2002; 29: 327–333. doi:10.1006/jasc.2002.0707.
17. Olivier Marti B, Tortosa JE, Caballines JJ, Puchol OG, Lopez de Pablo JF. El Mesolítico geométrico de tipo “cocina” en el País Valenciano. In: Utrilla Miranda M del P, Montes L, editors. *El mesolítico geométrico en la Península Ibérica.* Zaragoza: Universidad de Zaragoza; 2009. pp. 205–258.
18. Tortosa JE, Carrion Marco Y, Puchol OG, Jardon Giner P, Jorda Pardo JF, Balaguer ML, et al. Epipaleolítico-Mesolítico en las Comarcas Centrales Valencianas. In: Alday Ruiz A, editor. *El Mesolítico des muescas y denticulados en la cuenca del Ebro y el litoral mediterráneo.* Vitoria-Gasteiz: Diputación Foral de Álava; 2006. pp. 65–118.
19. Alday Ruiz A. El Mesolítico de muescas y denticulados en la Cuenca del Ebro y el litoral Mediterráneo peninsular: síntesis de los datos. In: Alday Ruiz A, editor. *El mesolítico de muescas y denticulados en la cuenca del Ebro y el litoral mediterráneo peninsular.* Vitoria-Gasteiz: Diputación Foral de Álava; 2006. pp. 303–317.

20. Vaquero Rodríguez M. El Mesolítico de Facies Macrolítica en el centro y sur de Cataluña. In: Alday Ruiz A, editor. El mesolítico de muescas y denticulados en la cuenca del Ebro y el litoral mediterráneo peninsular. Vitoria-Gasteiz: Diputación Foral de Álava; 2006. pp. 137–160.
21. Perlès C, Vanhaeren M. Black Cyclope neritea Marine Shell Ornaments in the Upper Palaeolithic and Mesolithic of Franchthi Cave, Greece: Arguments for Intentional Heat Treatment. *J Field Archaeol.* 2010; 35: 298–309. doi:10.1179/009346910X12707321358874.
22. Ketterer I, Ducrocq T. Le gisement mésolithique du “Petit Marais”, La Chaussée-Tirancourt (Somme). *Bull Société Préhistorique Fr.* 1995; 92: 249–260.
23. Perrin T, Marchand G, Allard P, Binder D, Collina C, Puchol OG, et al. Le second Mésolithique d’Europe occidentale : origines et gradient chronologique. *Ann Fond Fyssen.* 2009; 24: 160–176.
24. Marchand G. La néolithisation de l’ouest de la France : aires culturelles et transferts techniques dans l’industrie lithique. *Bull Société Préhistorique Fr.* 2000; 97: 377–403.
25. Eriksson G, Lougas L, Zagorska I. Stone Age hunter–fisher–gatherers at Zvejnieki, northern Latvia: radiocarbon, stable isotope and archaeozoology data. *Farming.* 2003; 1: 1–25.
26. Stančikaitė M, Baltrūnas V, Šinkūnas P, Kisielienė D, Ostrauskas T. Human response to the Holocene environmental changes in the Biržulis Lake region, NW Lithuania. *Quat Int.* 2006; 150: 113–129. doi:10.1016/j.quaint.2006.01.010.
27. Casella Colin E, Fowler C. *The Archaeology of Plural and Changing Identities : Beyond Identification.* New York: Springer; 2005.
28. Terberger T. The Mesolithic Hunter-Fisher-Gatherers on the Northern German Plain. In: Hansen KM, Pedersen KB, editors. *Across the western Baltic.* Vordingborg: Sydsjællands Museum; 2006. pp. 11–85.
29. Hinz M, Feeser I, Sjögren K-G, Müller J. Demography and the intensity of cultural activities: an evaluation of Funnel Beaker Societies (4200–2800 cal BC). *J Archaeol Sci.* 2012; 39: 3331–3340. doi:10.1016/j.jas.2012.05.028.
30. Zvelebil M, Dennell RW, Domanska L. *Harvesting the sea, farming the forest: the emergence of Neolithic societies in the Baltic region.* Sheffield: Sheffield Academic Press; 1998.
31. Zvelebil M. Innovating hunter-gatherers: the Mesolithic in the Baltic. In: Bailey G, Spikins P, editors. *Mesolithic Europe.* Cambridge: Cambridge University Press; 2009. pp. 18–59.
32. Velichko AA, Kurenkova EI, Dolukhanov PM. Human socio-economic adaptation to environment in Late Palaeolithic, Mesolithic and Neolithic Eastern Europe. *Quat Int.* 2009; 1-2: 1-9.
33. Brinch Petersen E, Kozłowski SK. A survey of the Late Palaeolithic and the Mesolithic of Denmark. In: Kozłowski S, editor. *The Mesolithic in Europe.* Warsaw: Warsaw University Press; 1973. pp. 77–127.
34. Auxiette G. Les bracelets néolithiques dans le Nord de la France, la Belgique et l’Allemagne rhénane. *Rev Archéologique Picardie.* 1989; 1-2: 13–65.

35. Barge H. Les parures du Néolithique ancien au début de l'Âge des Métaux en Languedoc. Paris: CTHS; 1983.
36. Barge H, Bellier C, Bott S, Cattelain P. Fiches typologiques de l'industrie osseuse préhistorique. Cahier IV : Objets de parure. Aix en Provence: Publication de l'Université de Provence; 1991.
37. Beck CH. Classification and Nomenclature of Beads and Pendants. London: Soc Antiqu London; 1926.
38. Bonnardin S. La parure funéraire au Néolithique ancien dans les Bassins parisiens et rhénans - Rubané, Hinkelstein et Villeneuve-Saint-Germain. 49 M, editor Paris: Mémoire de la Société Préhistorique Française; 2009.
39. Courtin J, Gutherz X. Les bracelets en pierre du Néolithique méridional. Bull Soc Prehist Fr. 1976; 73: 352–369.
40. Praud I. La parure. In: Bostyn F, editor. Néolithique ancien en Haute-Normandie : Le village Villeneuve-Saint-Germain de Poses "Sur la mare" et les sites de la boucle du Vaudreuil. Paris: Société préhistorique française; 2003. pp. 137–256.
41. Taborin Y. La parure en coquillage de l'Épipaléolithique au Bronze ancien en France. Gall Préhistoire. 1974; 17: 101–417.
42. Vanhaeren M, d' Errico F. Aurignacian ethno-linguistic geography of Europe revealed by personal ornaments. J Archaeol Sci. 2006; 33: 1–24.
